# Supplementary material for: The efficient and selective biocatalytic oxidation of norisoprenoid and aromatic substrates by CYP101B1 from Novosphingobium aromaticivorans DSM12444
Source: Royal Society of Chemistry journal article supplement (doi:10.1039/c4ra14010a), 2014-12-12
Supplement: c4ra14010a1.pdf [file c4ra14010a1.pdf]

## Electronic Supplementary Information for

# The efficient and selective biocatalytic oxidation of norisoprenoid and aromatic substrates by CYP101B1 from *Novosphingobium aromaticivorans* DSM12444

Emma A. Hall and Dr. Stephen G. Bell\*

**Table S1.** Comparison of the sequence identities of CYP101B1, CYP101B2 (*N. tardaugens*), CYP101A1 (*P. putida*), CYP101D1, CYP101D2, CYP101C1 (all *N. aromaticivorans*, P450cin (*C. braakii*) CYP109D1, CYP246B1 (both *S. cellulosum*) and CYP105D1 (*S. griseus*). We note that other P450s from *S. cellulosum* had greater similarity to CYP101B1 the greatest being CYP124E1.

| <b>CYP101B1</b> | <b>Identities</b> | <b>Positives</b> | <b>Gaps</b> | <b>Score</b> |
|-----------------|-------------------|------------------|-------------|--------------|
| <b>CYP101B2</b> | 236/398(59%)      | 297/398(74%)     | 6/398(1%)   | 489          |
| <b>CYP101D2</b> | 184/403(46%)      | 254/403(63%)     | 9/403(2%)   | 348          |
| <b>CYP101A1</b> | 173/395(44%)      | 236/395(59%)     | 3/395(1%)   | 340          |
| <b>CYP101D1</b> | 177/401(44%)      | 249/401(62%)     | 9/401(2%)   | 327          |
| <b>CYP101C1</b> | 142/395(36%)      | 218/395(55%)     | 5/395(1%)   | 256          |
| <b>P450cin</b>  | 102/373(27%)      | 169/373(45%)     | 6/373(1%)   | 145          |
| <b>CYP109D1</b> | 95/307(31%)       | 142/307(46%)     | 16/307(5%)  | 122          |
| <b>CYP105D1</b> | 88/313(28%)       | 144/313(46%)     | 13/313(4%)  | 107          |
| <b>CYP264B1</b> | 79/332(24%)       | 138/332(41%)     | 15/332(4%)  | 70.5         |

**Table S2** The comparison of likely residues in the active site, substrate binding channel and in close proximity of the heme of CYP101B1 (based on the CYP101C1, CYP101D1 and CYP101D2 structures) and the corresponding residues in CYP101B2, CYP101D2, CYP101A1, CYP101D1 and CYP101C1.

| <b>CYP101B1</b>      | <b>CYP101B2</b>      | <b>CYP101D2</b>      | <b>CYP101A1</b>      | <b>CYP101D1</b>      | <b>CYP101C1</b>      |
|----------------------|----------------------|----------------------|----------------------|----------------------|----------------------|
| Arg72                | Arg76                | Glu84                | Glu84                | Arg85                | Gln70                |
| Ile74                | Ile78                | Ile86                | Pro86                | Ile87                | Leu72                |
| <b><u>Val75</u></b>  | <b><u>Val79</u></b>  | <b><u>Phe87</u></b>  | <b><u>Phe87</u></b>  | <b><u>Trp88</u></b>  | <b><u>Ala73</u></b>  |
| Val76                | Val80                | Ala92                | Ala92                | Ala93                | Leu78                |
| Gly77                | Gly81                | Gly93                | Gly93                | Gly94                | Gly79                |
| Glu78                | Glu82                | Glu94                | Glu94                | Glu95                | Lys80                |
| <b><u>His80</u></b>  | <b><u>His84</u></b>  | <b><u>Tyr96</u></b>  | <b><u>Tyr96</u></b>  | <b><u>Tyr97</u></b>  | <b><u>Met82</u></b>  |
| Gly81                | Gly85                | Gln97                | Asp97                | Asp98                | Gln83                |
| <b><u>Leu82</u></b>  | <b><u>Leu86</u></b>  | <b><u>Met98</u></b>  | <b><u>Phe98</u></b>  | <b><u>Met99</u></b>  | <b><u>Phe84</u></b>  |
| Thr85                | Thr89                | Thr101               | Thr101               | Thr102               | Leu87                |
| Glu144               | Glu148               | Glu156               | Glu156               | Thr157               | Glu142               |
| Arg166               | Arg170               | Ser178               | Lys178               | Gly179               | Arg164               |
| Glu170               | Glu174               | Arg182               | Asp182               | Asn183               | Val168               |
| <b>Thr173</b>        | <b>Thr177</b>        | <b>Thr185</b>        | <b>Thr185</b>        | <b>Thr186</b>        | <b>Thr171</b>        |
| <b>Arg174</b>        | <b>Arg178</b>        | <b>Arg186</b>        | <b>Arg186</b>        | <b>Arg187</b>        | <b>Arg172</b>        |
| <b>Pro175</b>        | <b>Pro179</b>        | <b>Pro187</b>        | <b>Pro187</b>        | <b>Pro188</b>        | <b>Pro173</b>        |
| Lys185               | Lys189               | Asn203               | Lys197               | Asn204               | Lys183               |
| Gln233               | Gln241               | Leu250               | Leu244               | Leu251               | Asn230               |
| <b><u>Ile236</u></b> | <b><u>Val244</u></b> | <b><u>Leu253</u></b> | <b><u>Val247</u></b> | <b><u>Leu254</u></b> | <b><u>Phe233</u></b> |
| Ala237               | Ala245               | Gly254               | Gly248               | Gly255               | Gly234               |
| <b>Asp240</b>        | <b>Asp248</b>        | <b>Asp257</b>        | <b>Asp251</b>        | <b>Asp258</b>        | <b>Asp237</b>        |
| <b>Thr241</b>        | <b>Asp249</b>        | <b>Thr258</b>        | <b>Thr252</b>        | <b>Thr259</b>        | <b>Thr238</b>        |
| Asn244               | Asn252               | Asn261               | Asn255               | Asn262               | Ala241               |
| <b>Val284</b>        | <b>Val293</b>        | <b>Val301</b>        | <b>Val295</b>        | <b>Val302</b>        | <b>Val281</b>        |
| Ile286               | Ile294               | Glu303               | Asp297               | Asp304               | Val283               |
| Ile384               | Ile393               | Ile401               | Ile395               | Ile402               | Asn383               |
| <b>Val385</b>        | <b>Val394</b>        | <b>Val402</b>        | <b>Val396</b>        | <b>Val403</b>        | <b>Val384</b>        |

**Figure S1.** The CYP101B1 *E. coli* whole-cell oxidation system after the addition of indole.

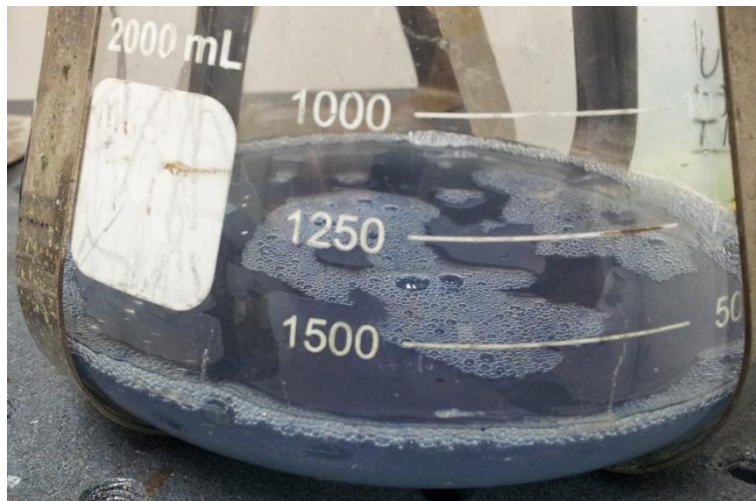

## NMR data

$^1\text{H-NMR}$ ,  $^{13}\text{C-NMR}$ , COSY and HSQC analysis of 3-hydroxy- $\beta$ -ionone, *trans*-3-hydroxy- $\alpha$ -ionone, 3-oxo-ionone, *cis*-3-hydroxy- $\alpha$ -ionone, 3-hydroxy- $\beta$ -damascone and 4-hydroxy- $\beta$ -damascone.

$^1\text{H-NMR}$  and COSY analysis of *trans*-4-phenylcyclohexanol

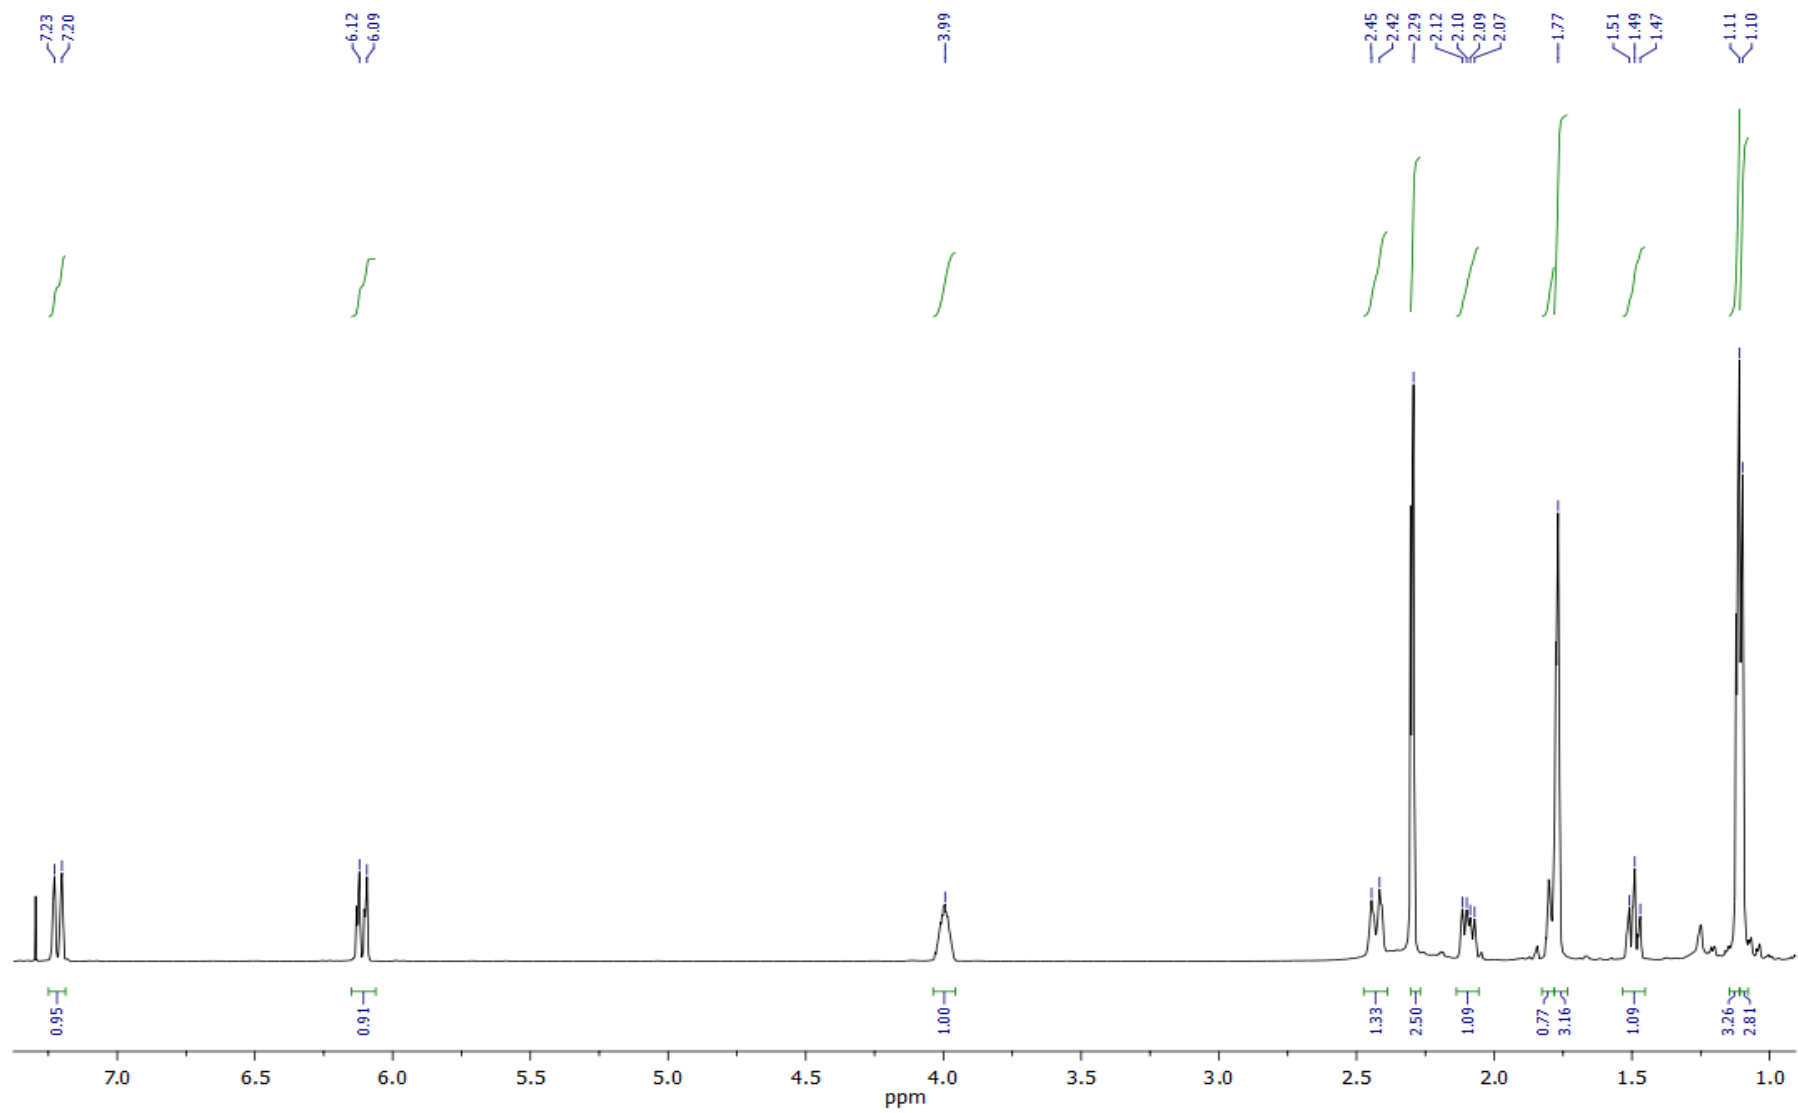

3-hydroxy- $\beta$ -ionone  $^1\text{H-NMR}$

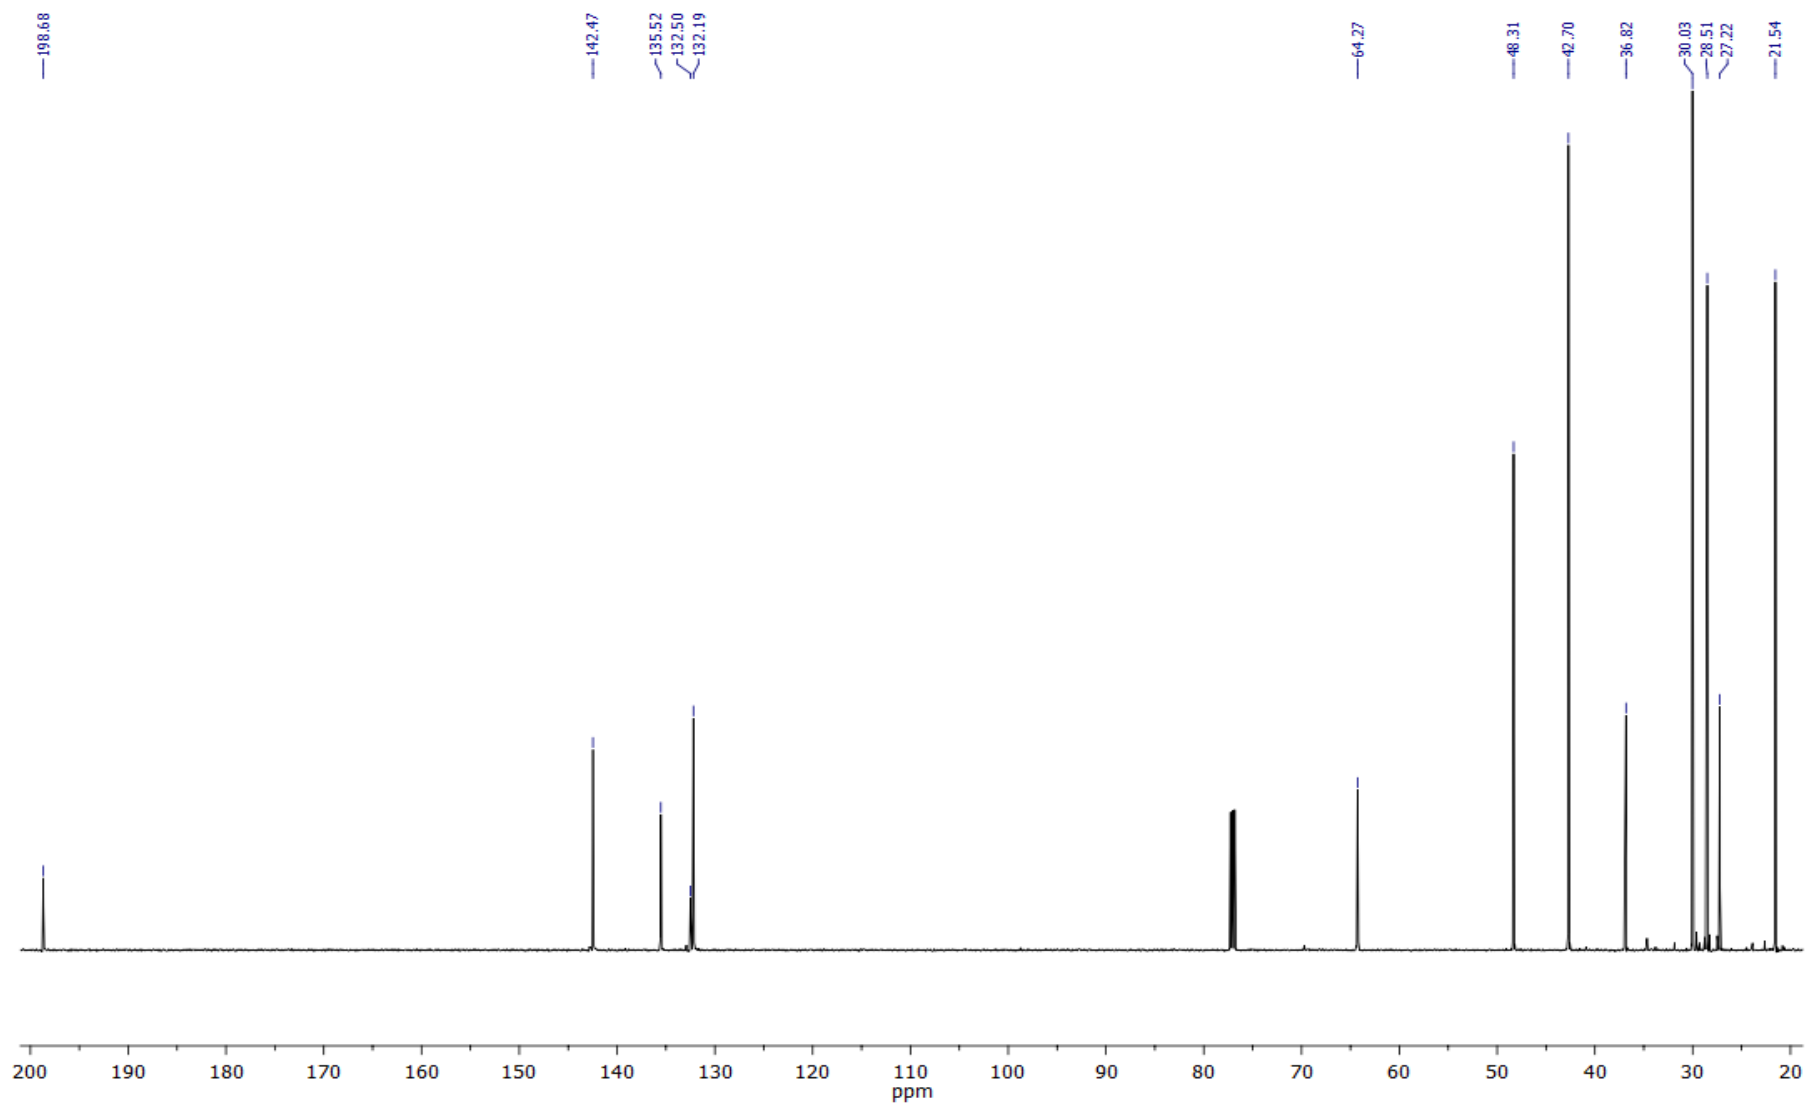

3-hydroxy- $\beta$ -ionone  $^{13}\text{C}$ -NMR

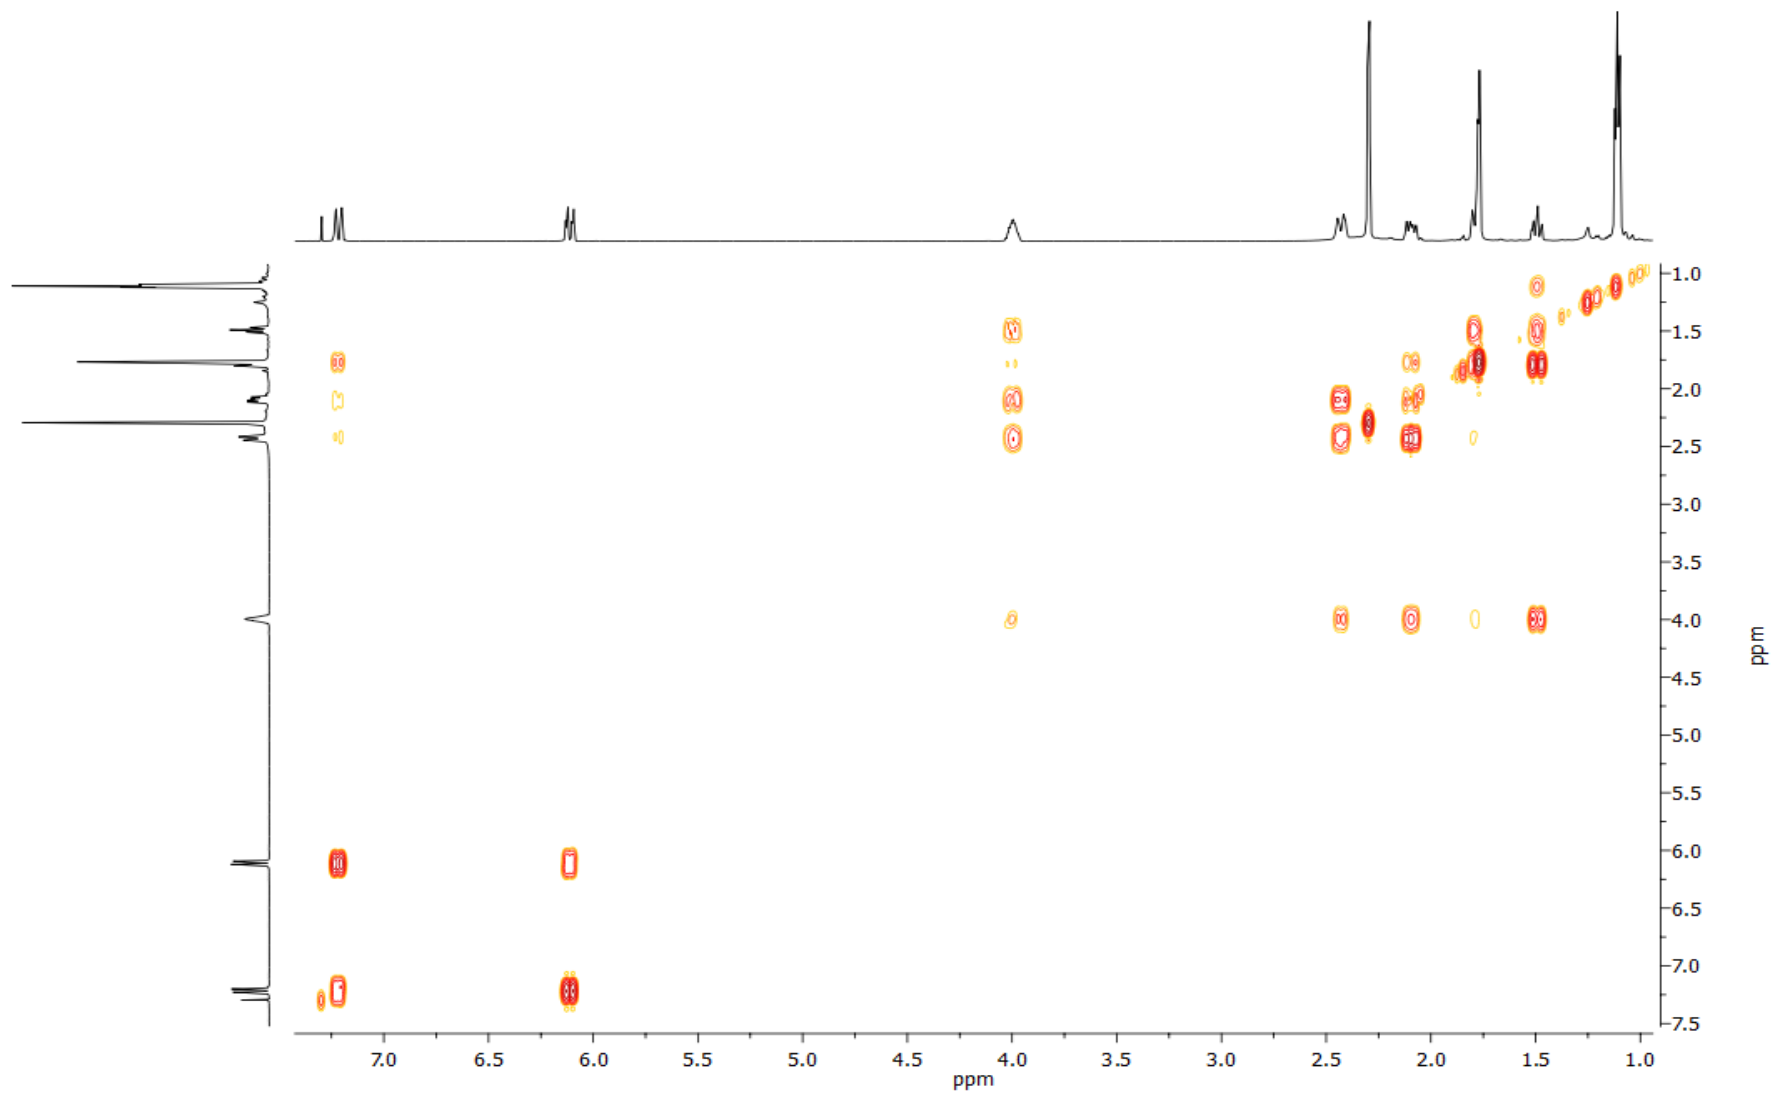

3-hydroxy- $\beta$ -ionone COSY

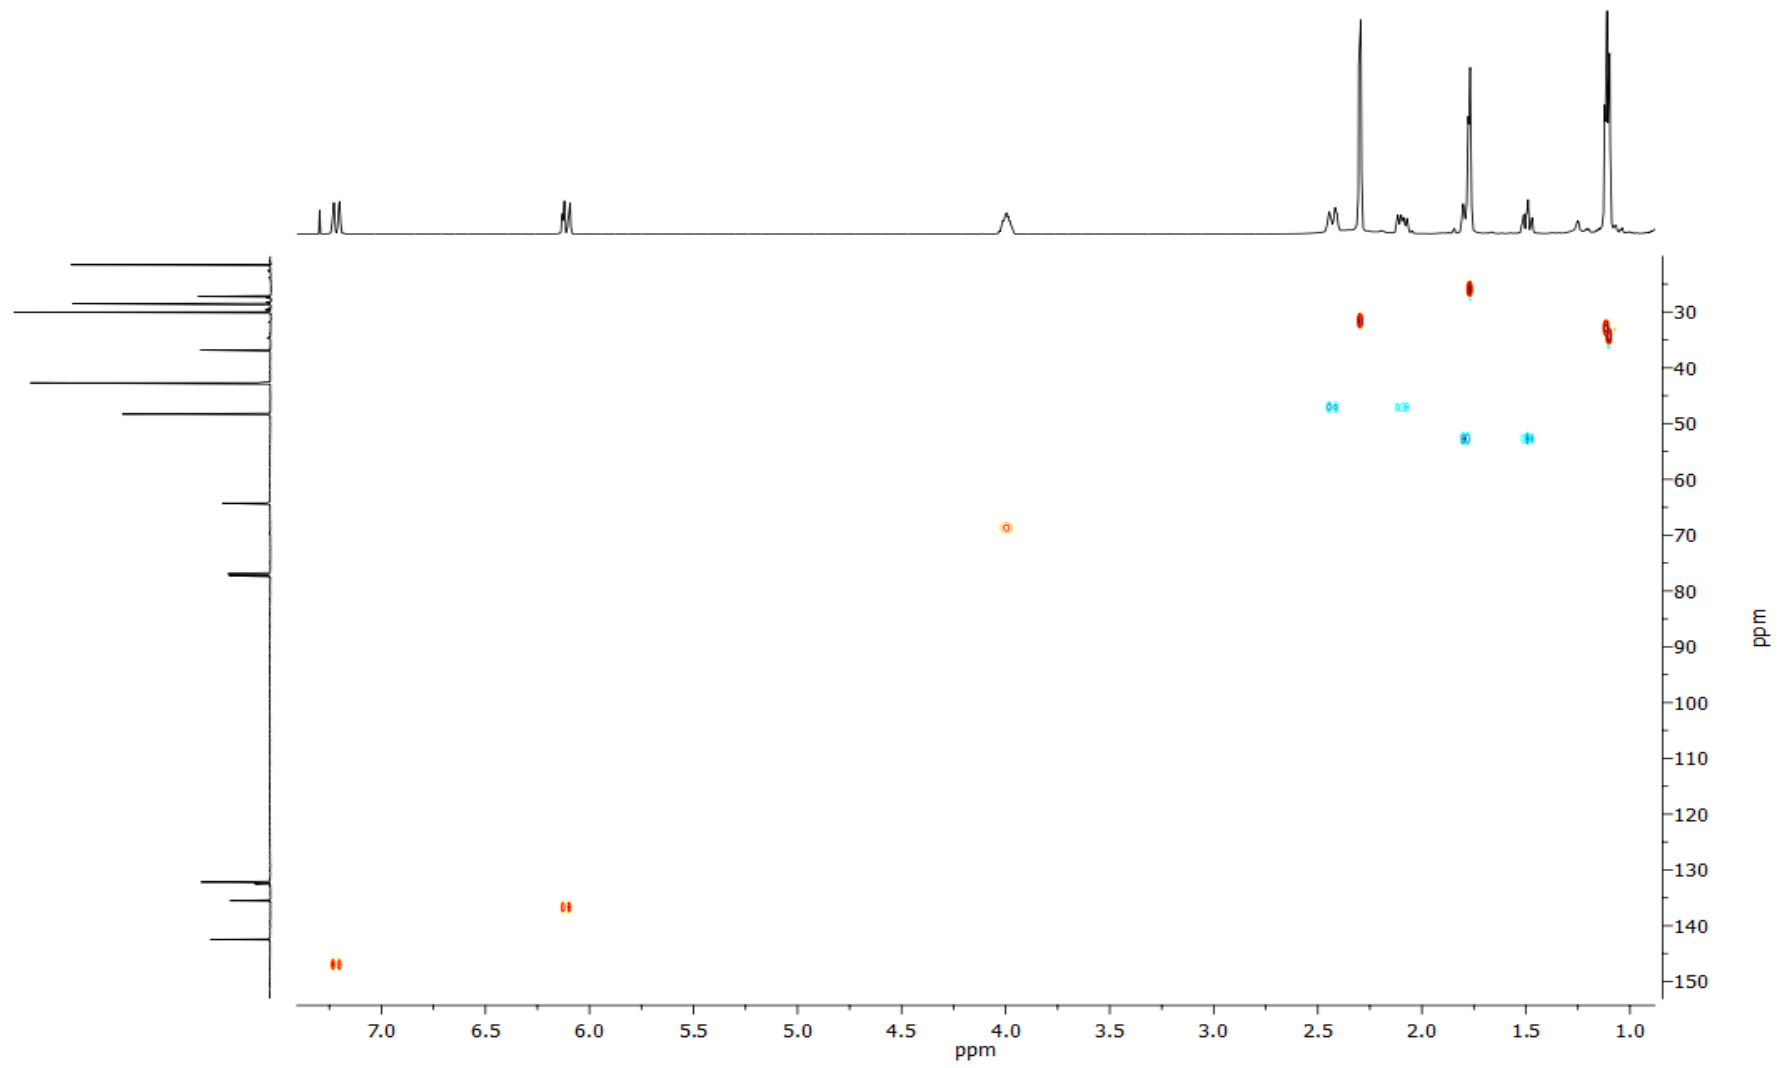

3-hydroxy- $\beta$ -ionone HSQC



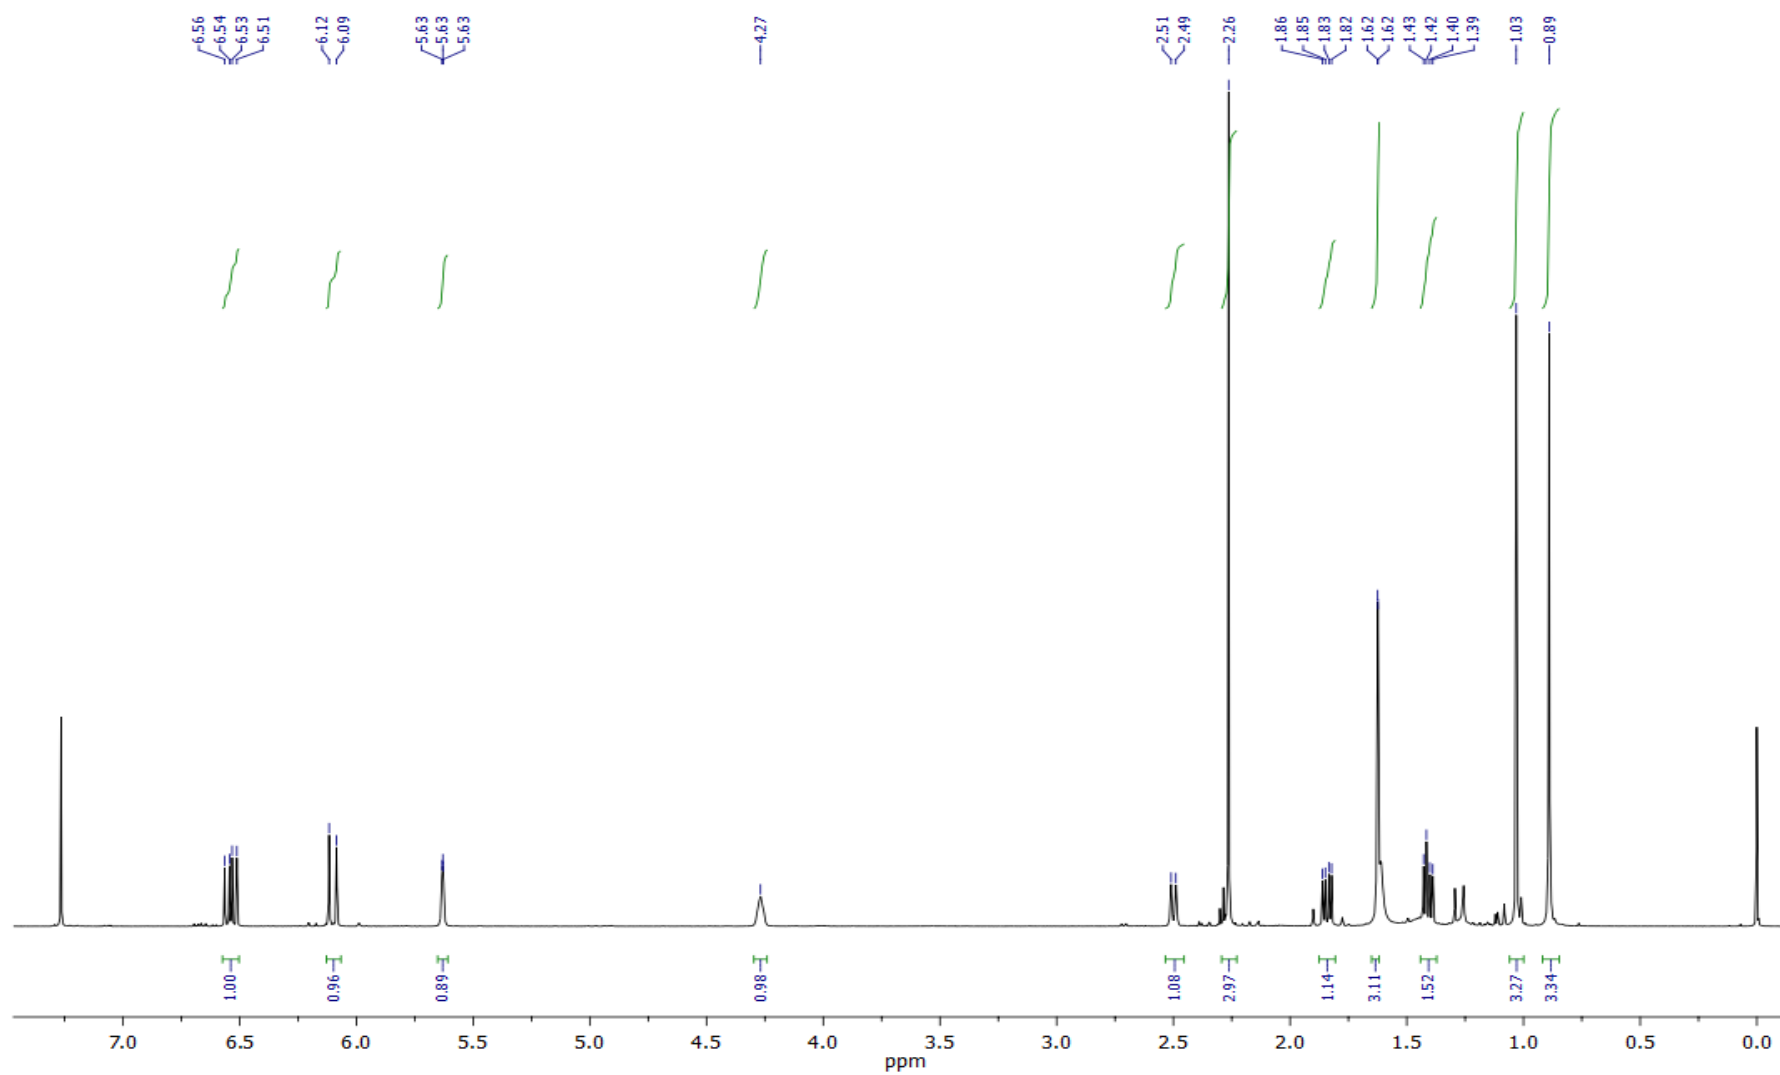

*trans*-3-hydroxy- $\alpha$ -ionone  $^1\text{H-NMR}$

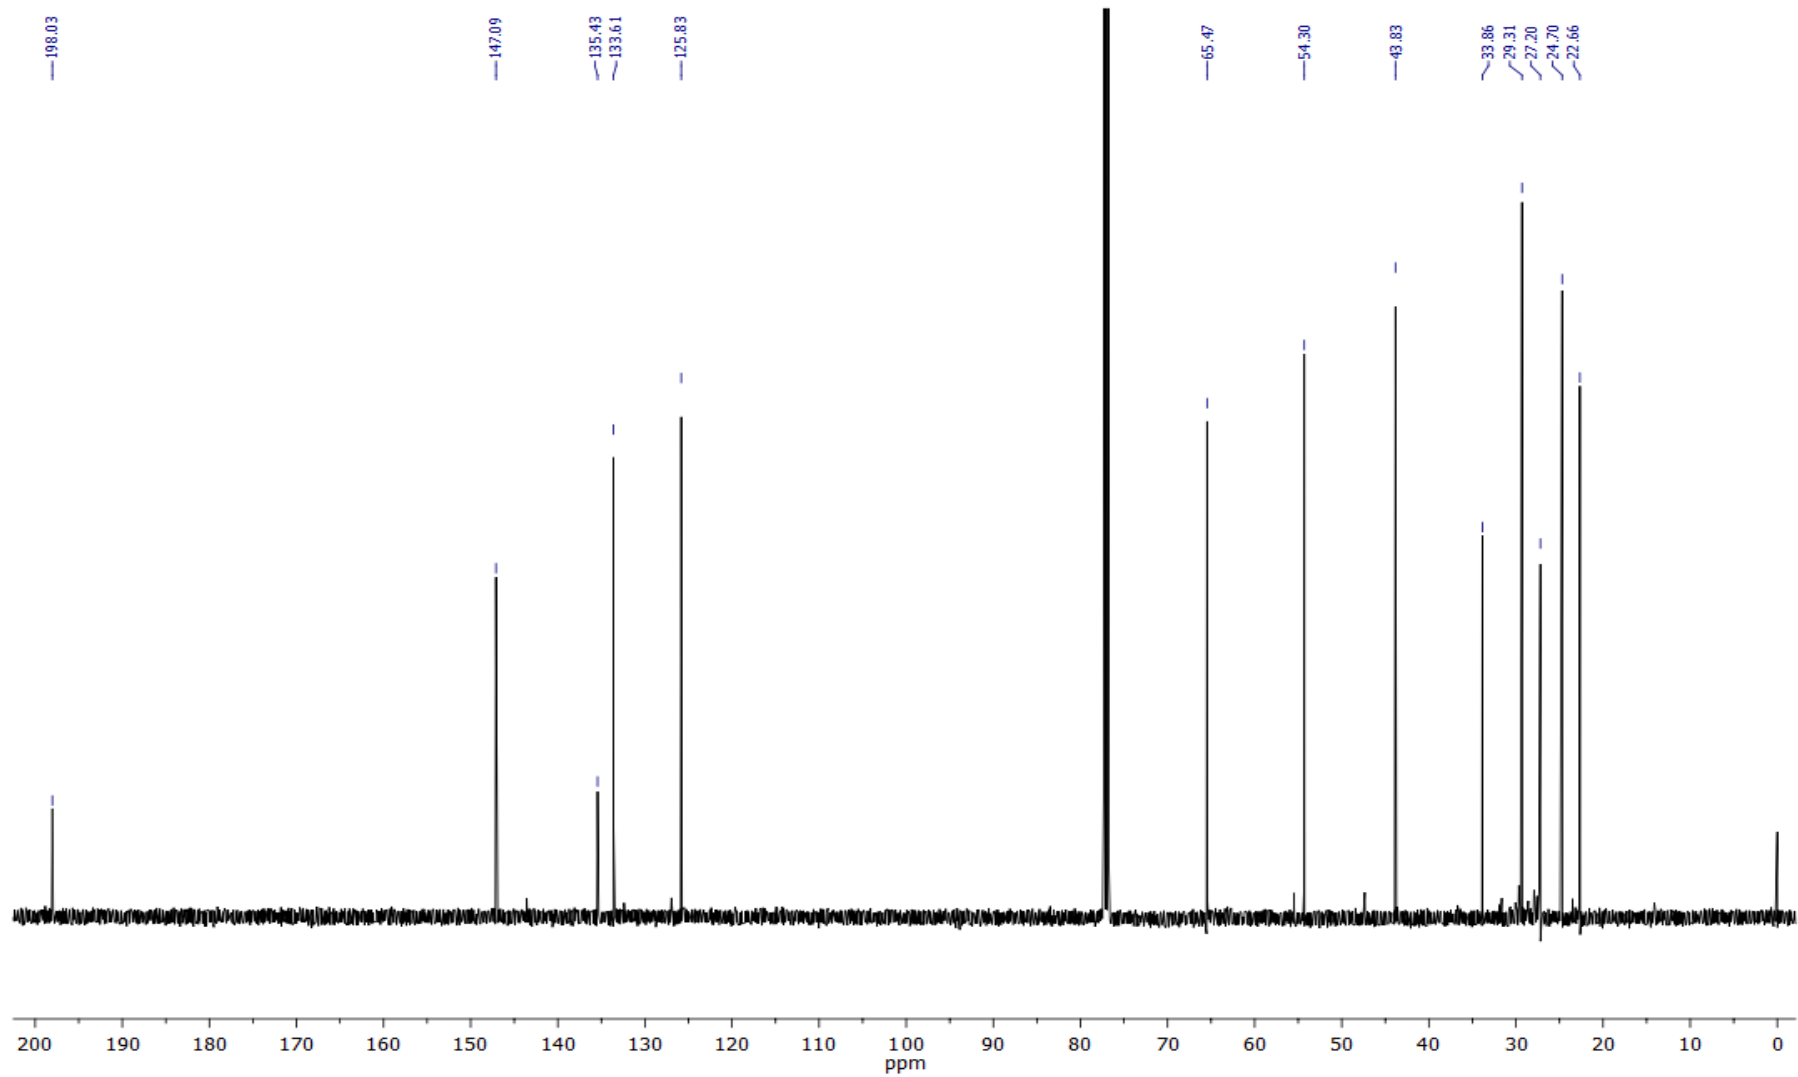

*trans*-3-hydroxy- $\alpha$ -ionone <sup>13</sup>C-NMR

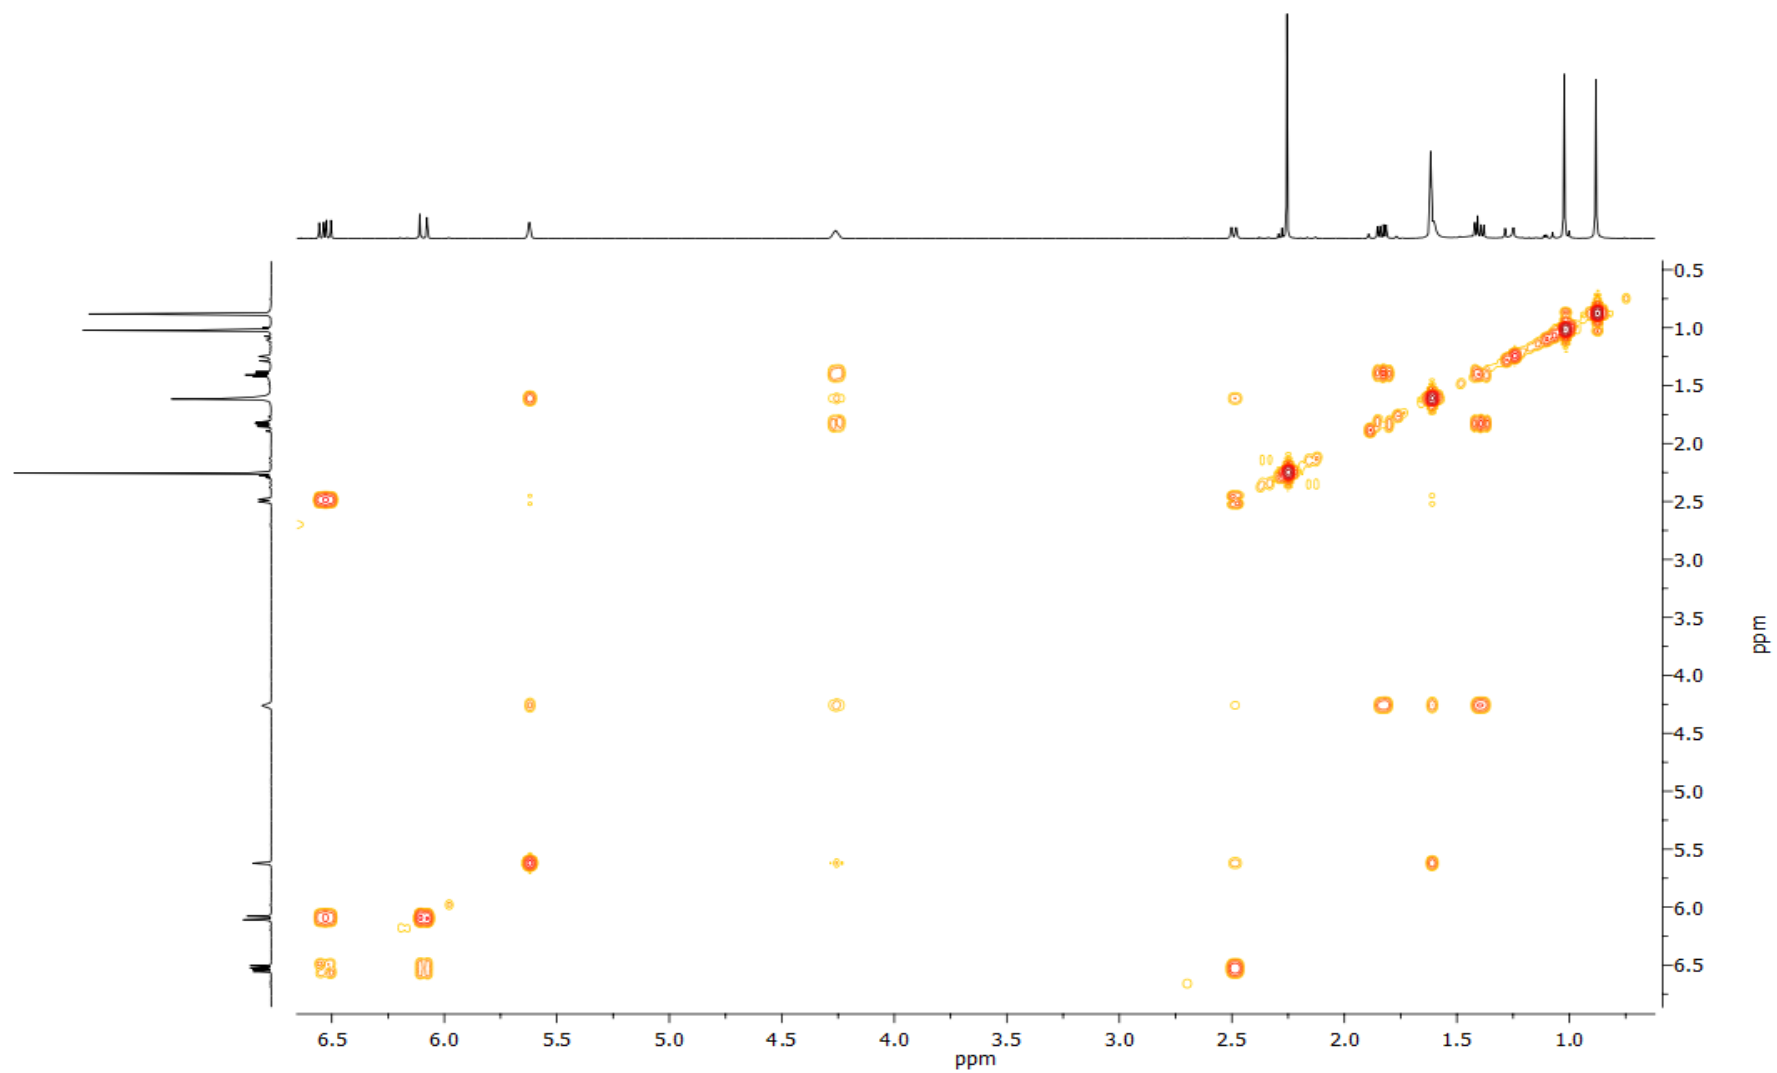

*trans*-3-hydroxy- $\alpha$ -ionone COSY

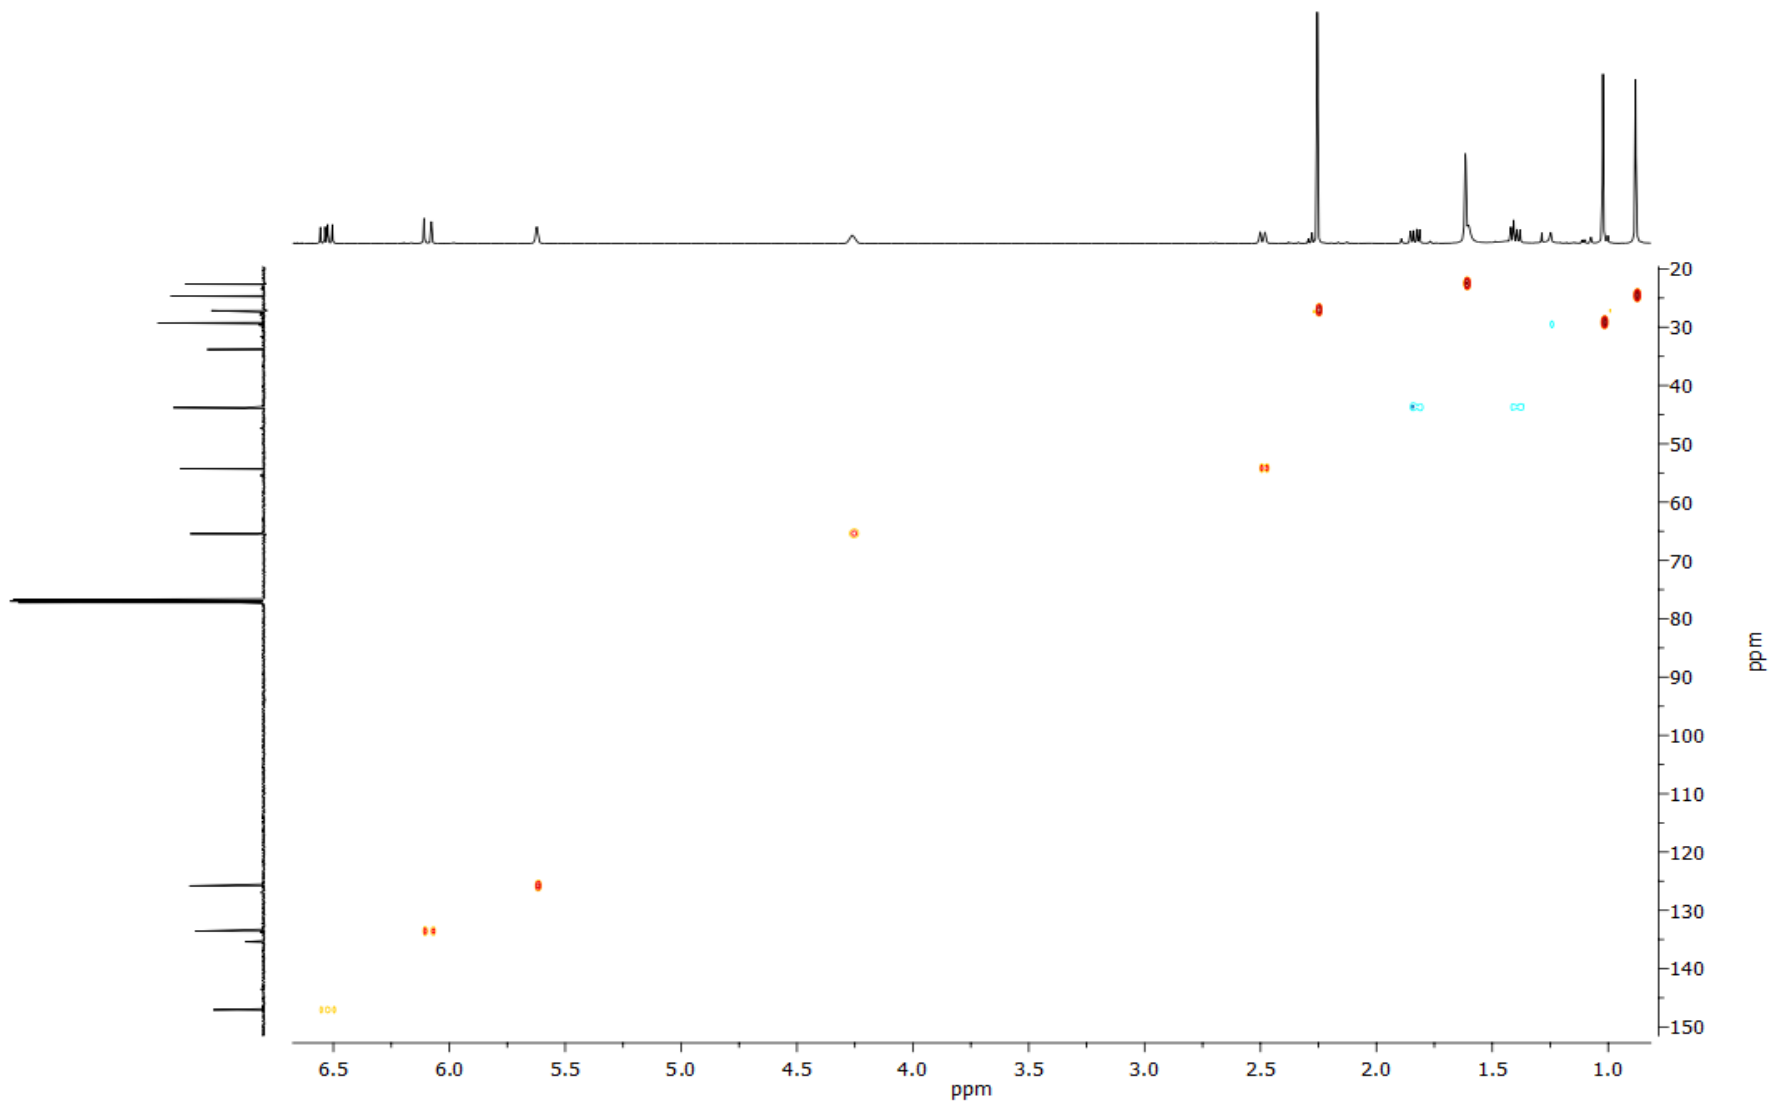

*trans*-3-hydroxy- $\alpha$ -ionone HSQC

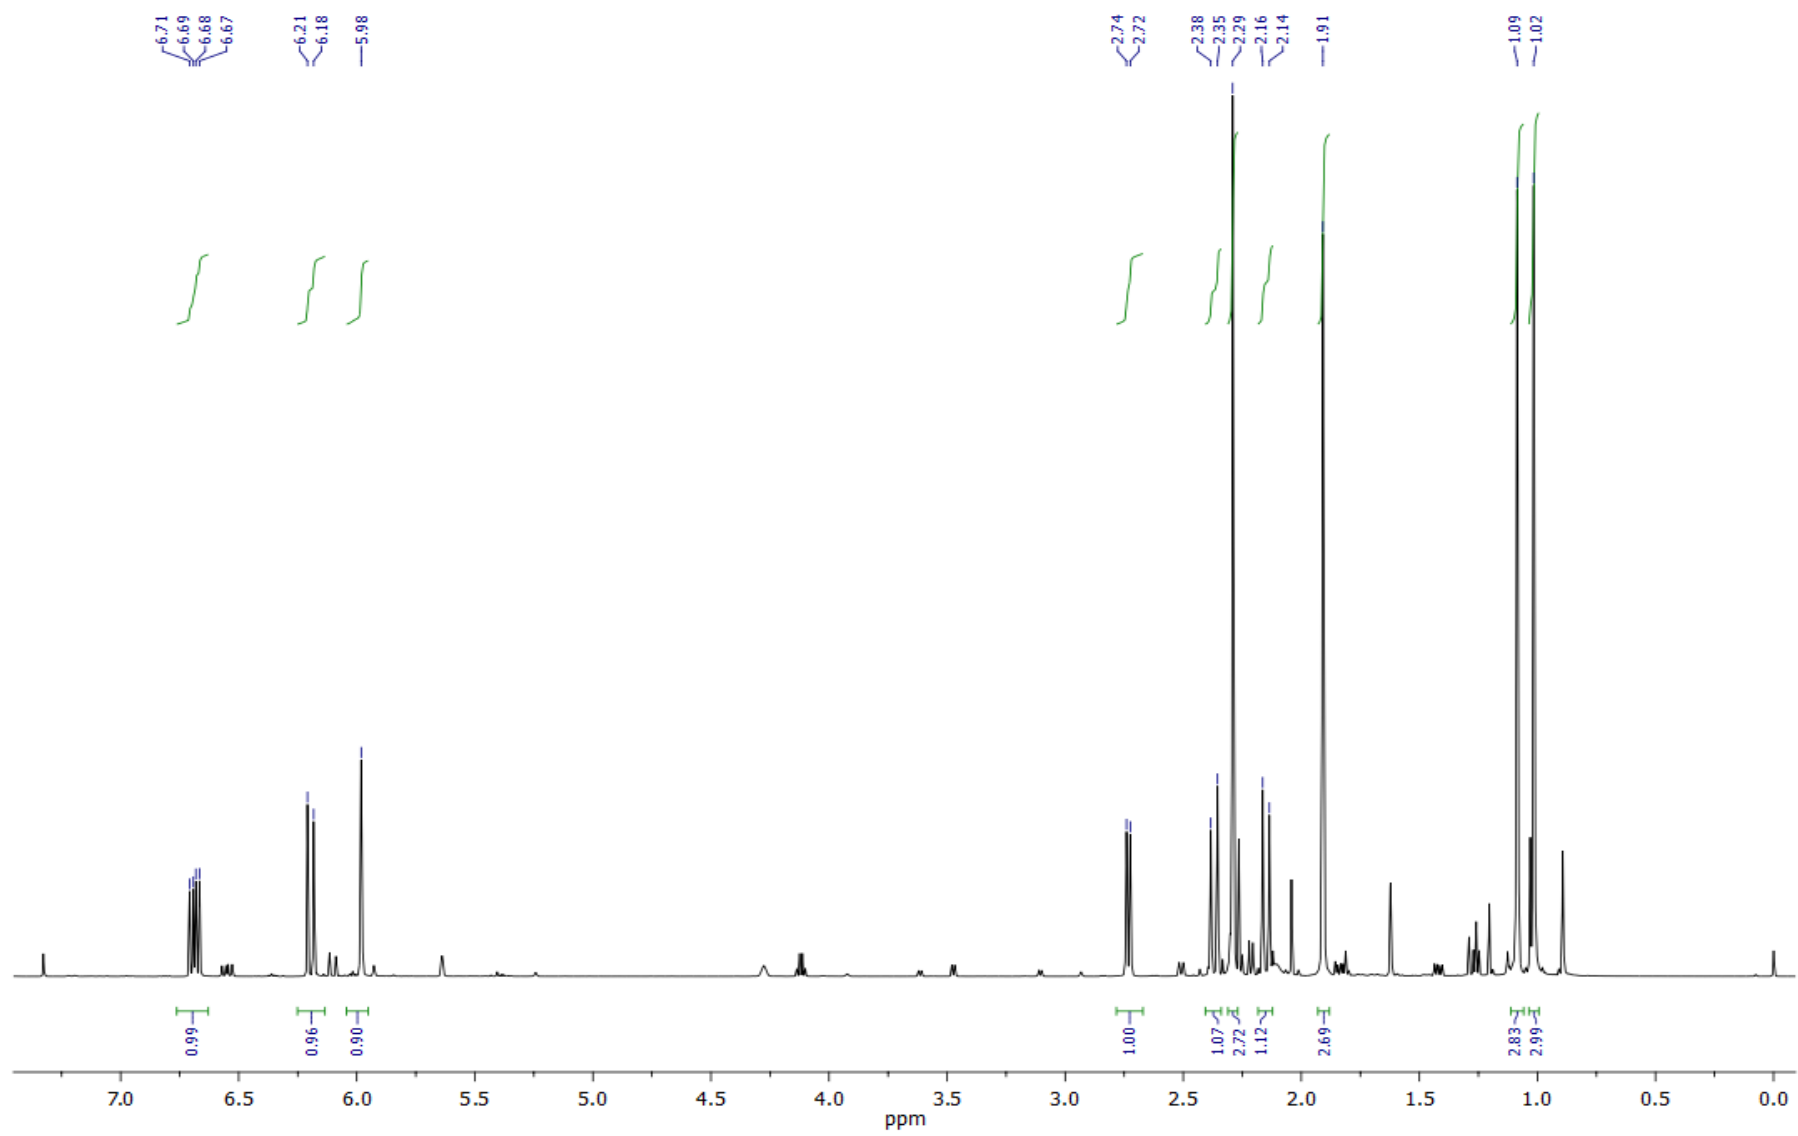

3-oxo- $\alpha$ -ionone  $^1\text{H-NMR}$

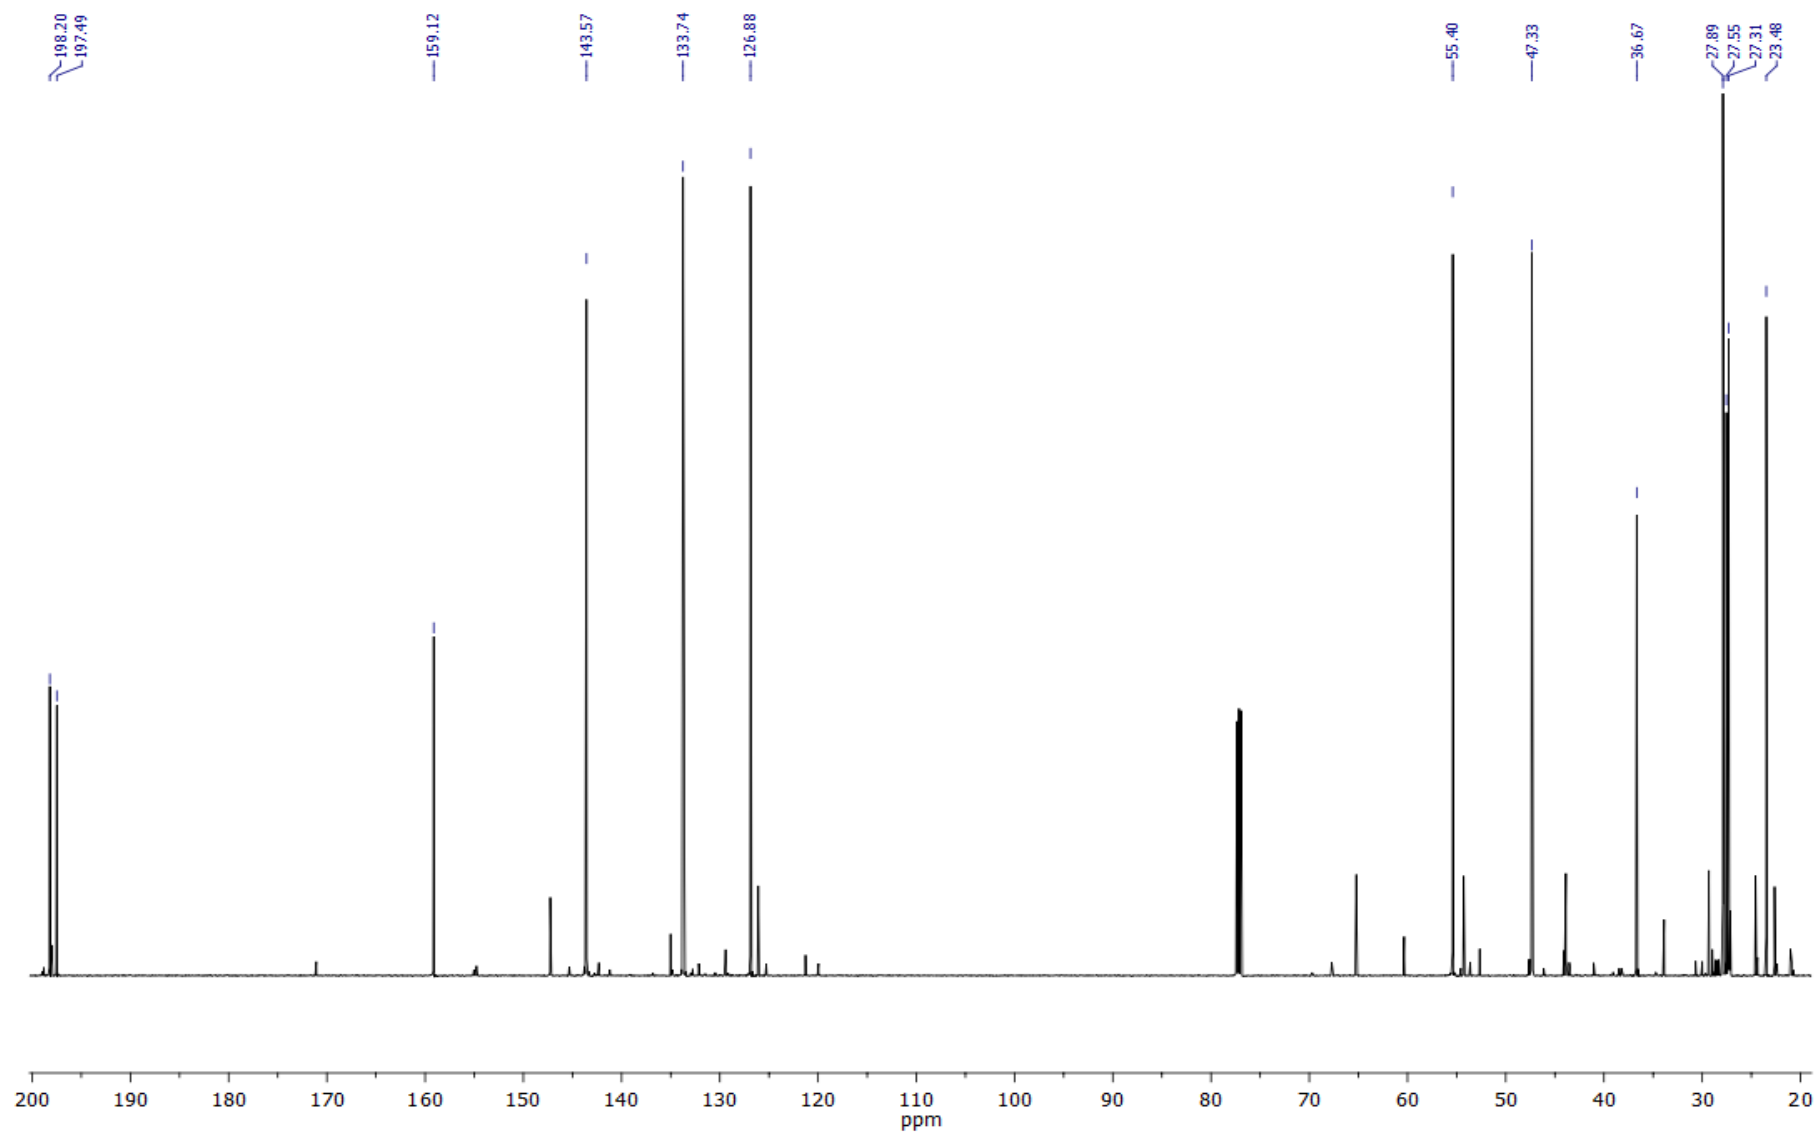

3-oxo- $\alpha$ -ionone  $^{13}\text{C}$ -NMR

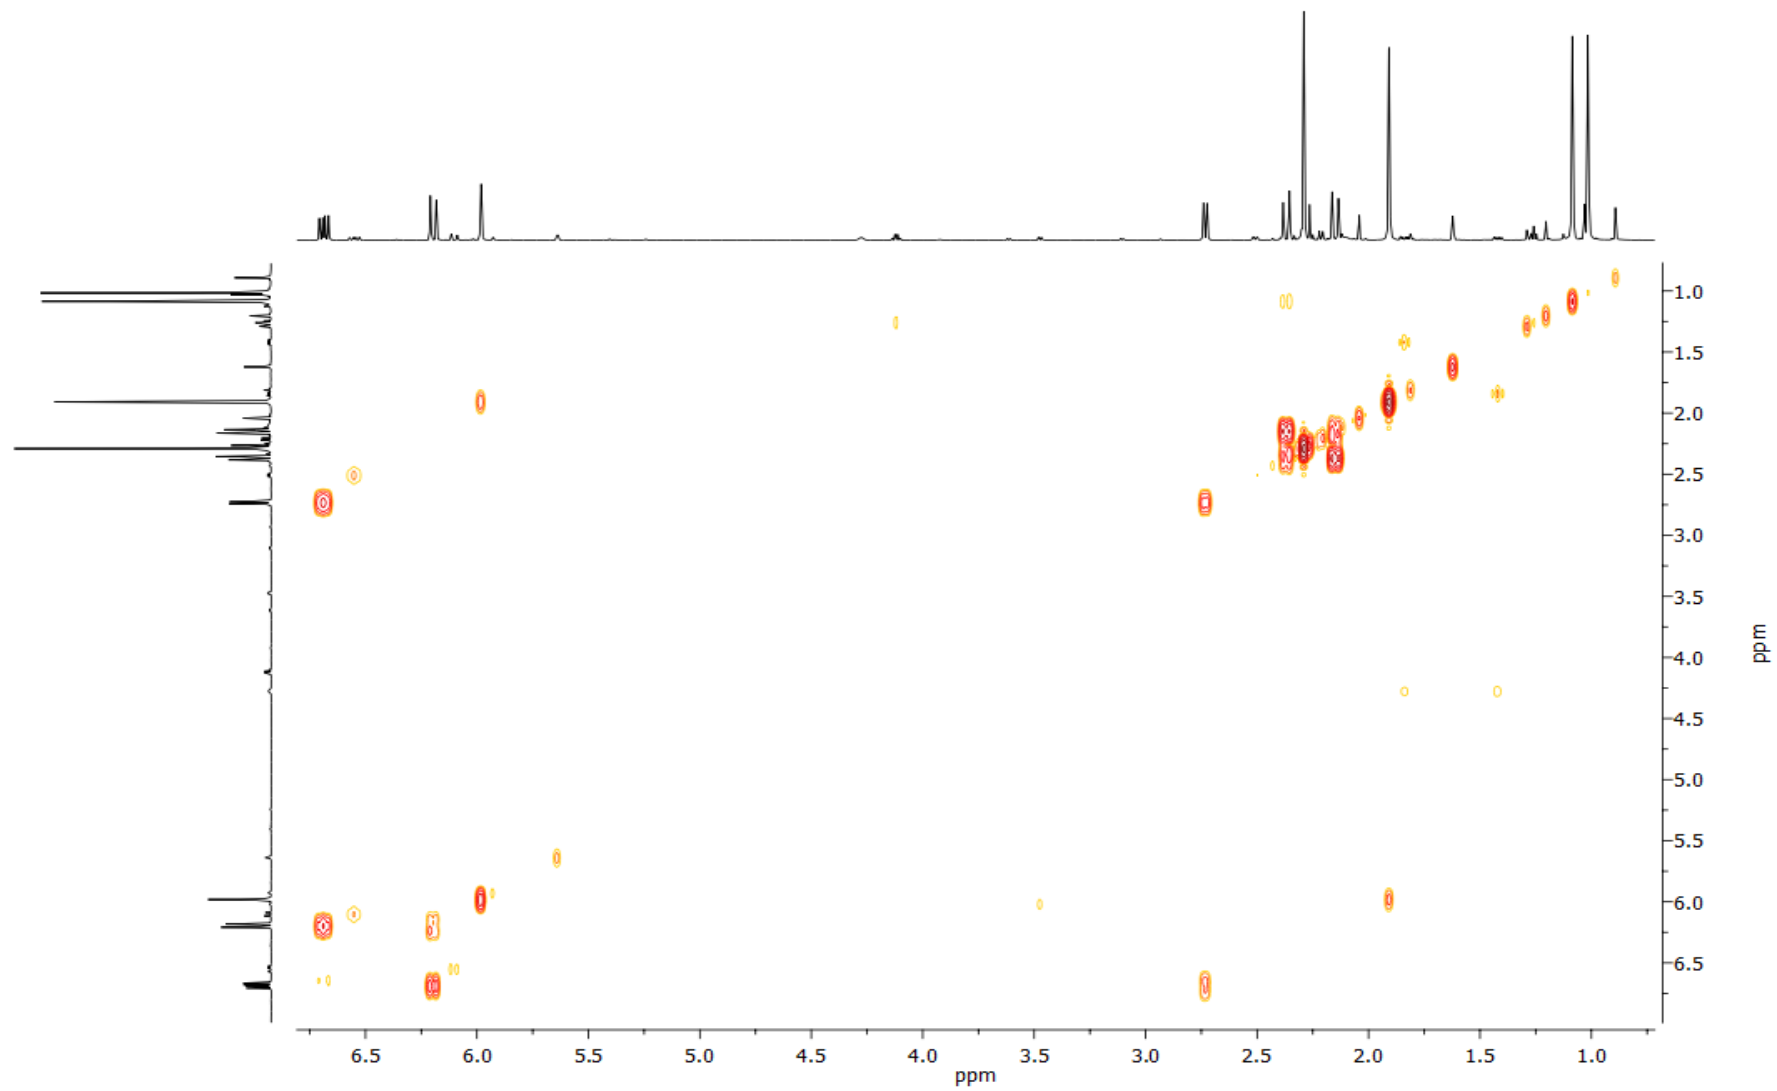

3-oxo- $\alpha$ -ionone COSY

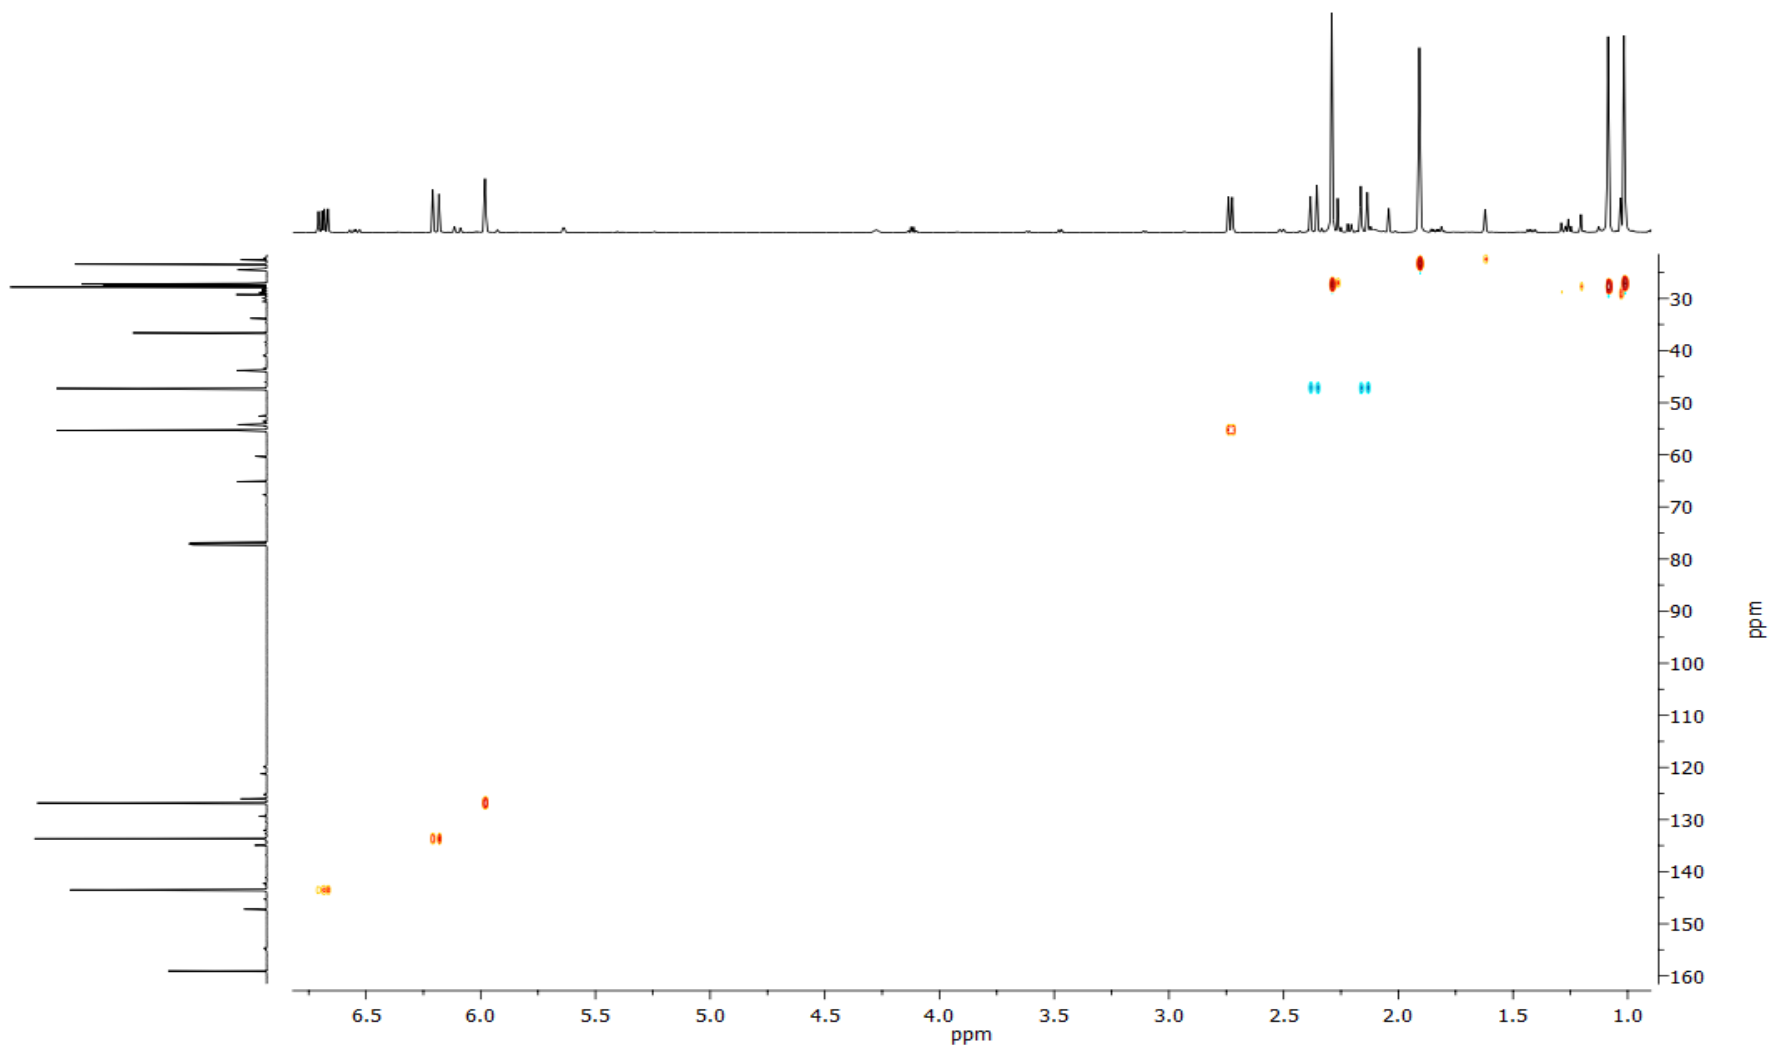

3-oxo- $\alpha$ -ionone HSQC



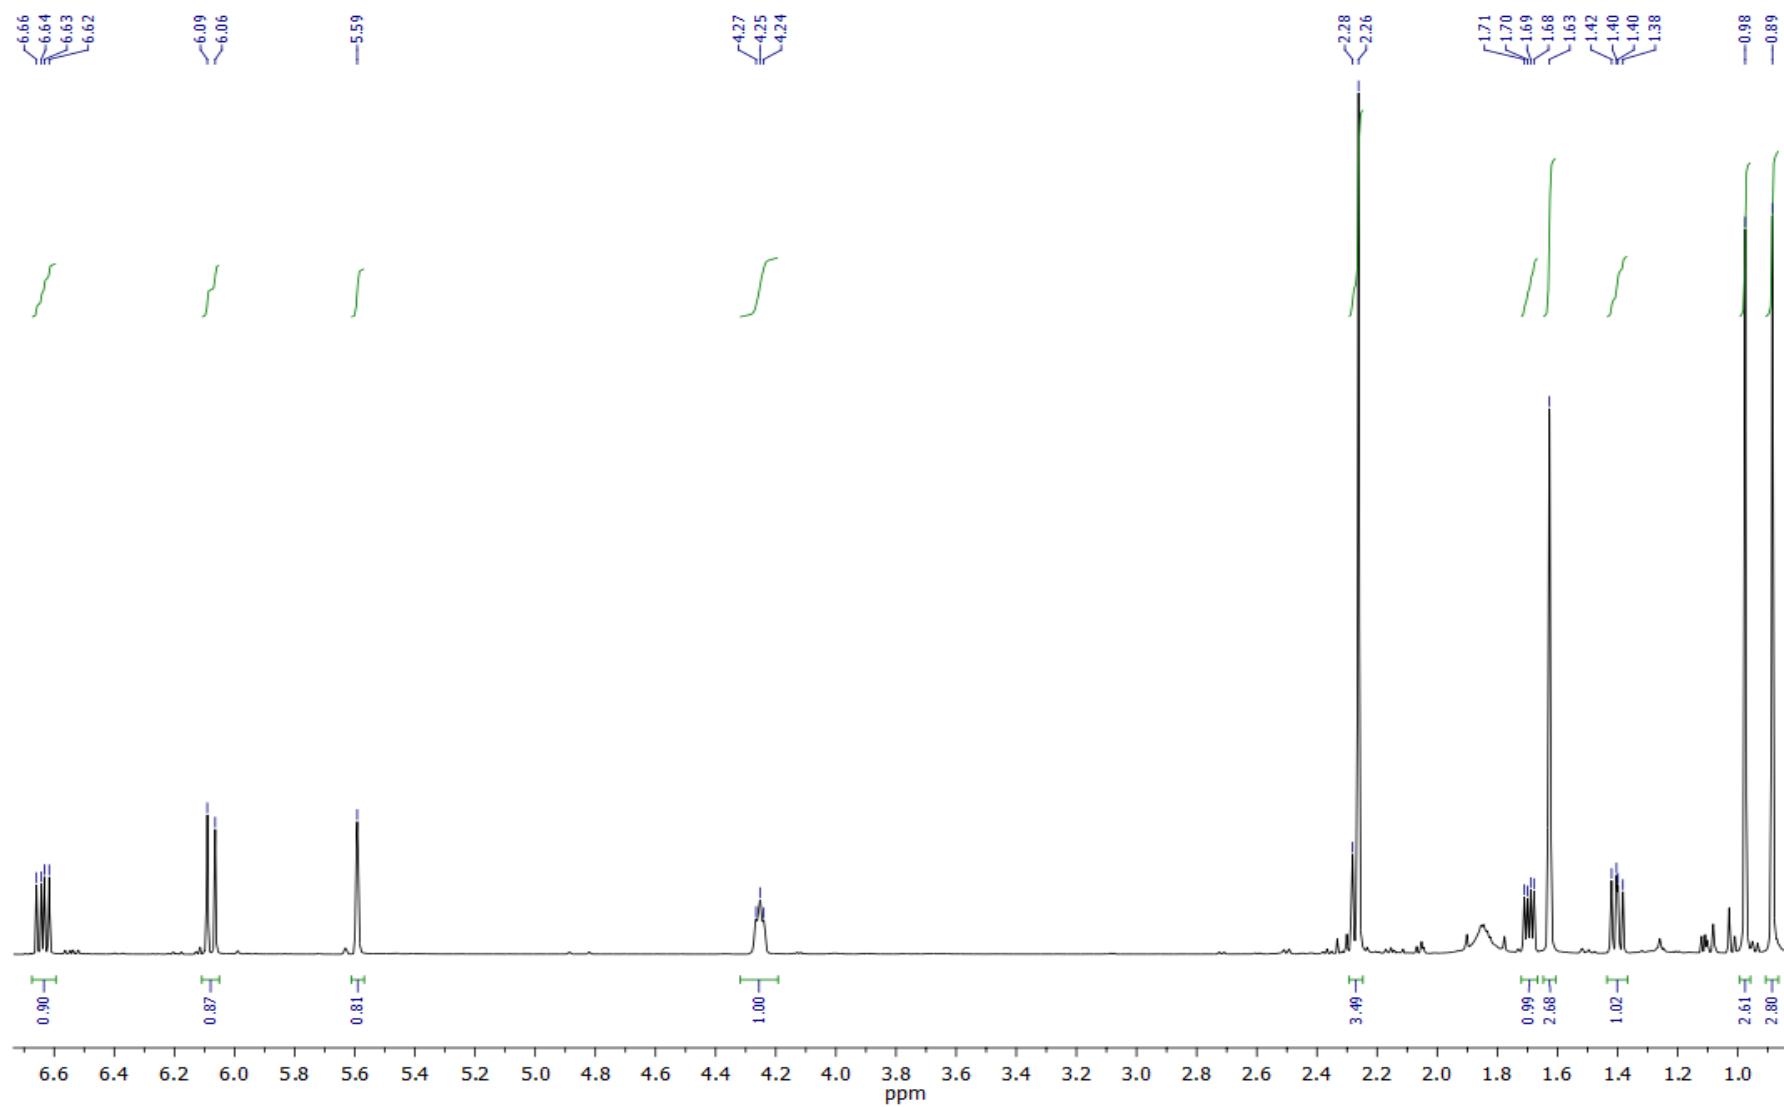

*cis*-3-hydroxy- $\alpha$ -ionone  $^1\text{H-NMR}$

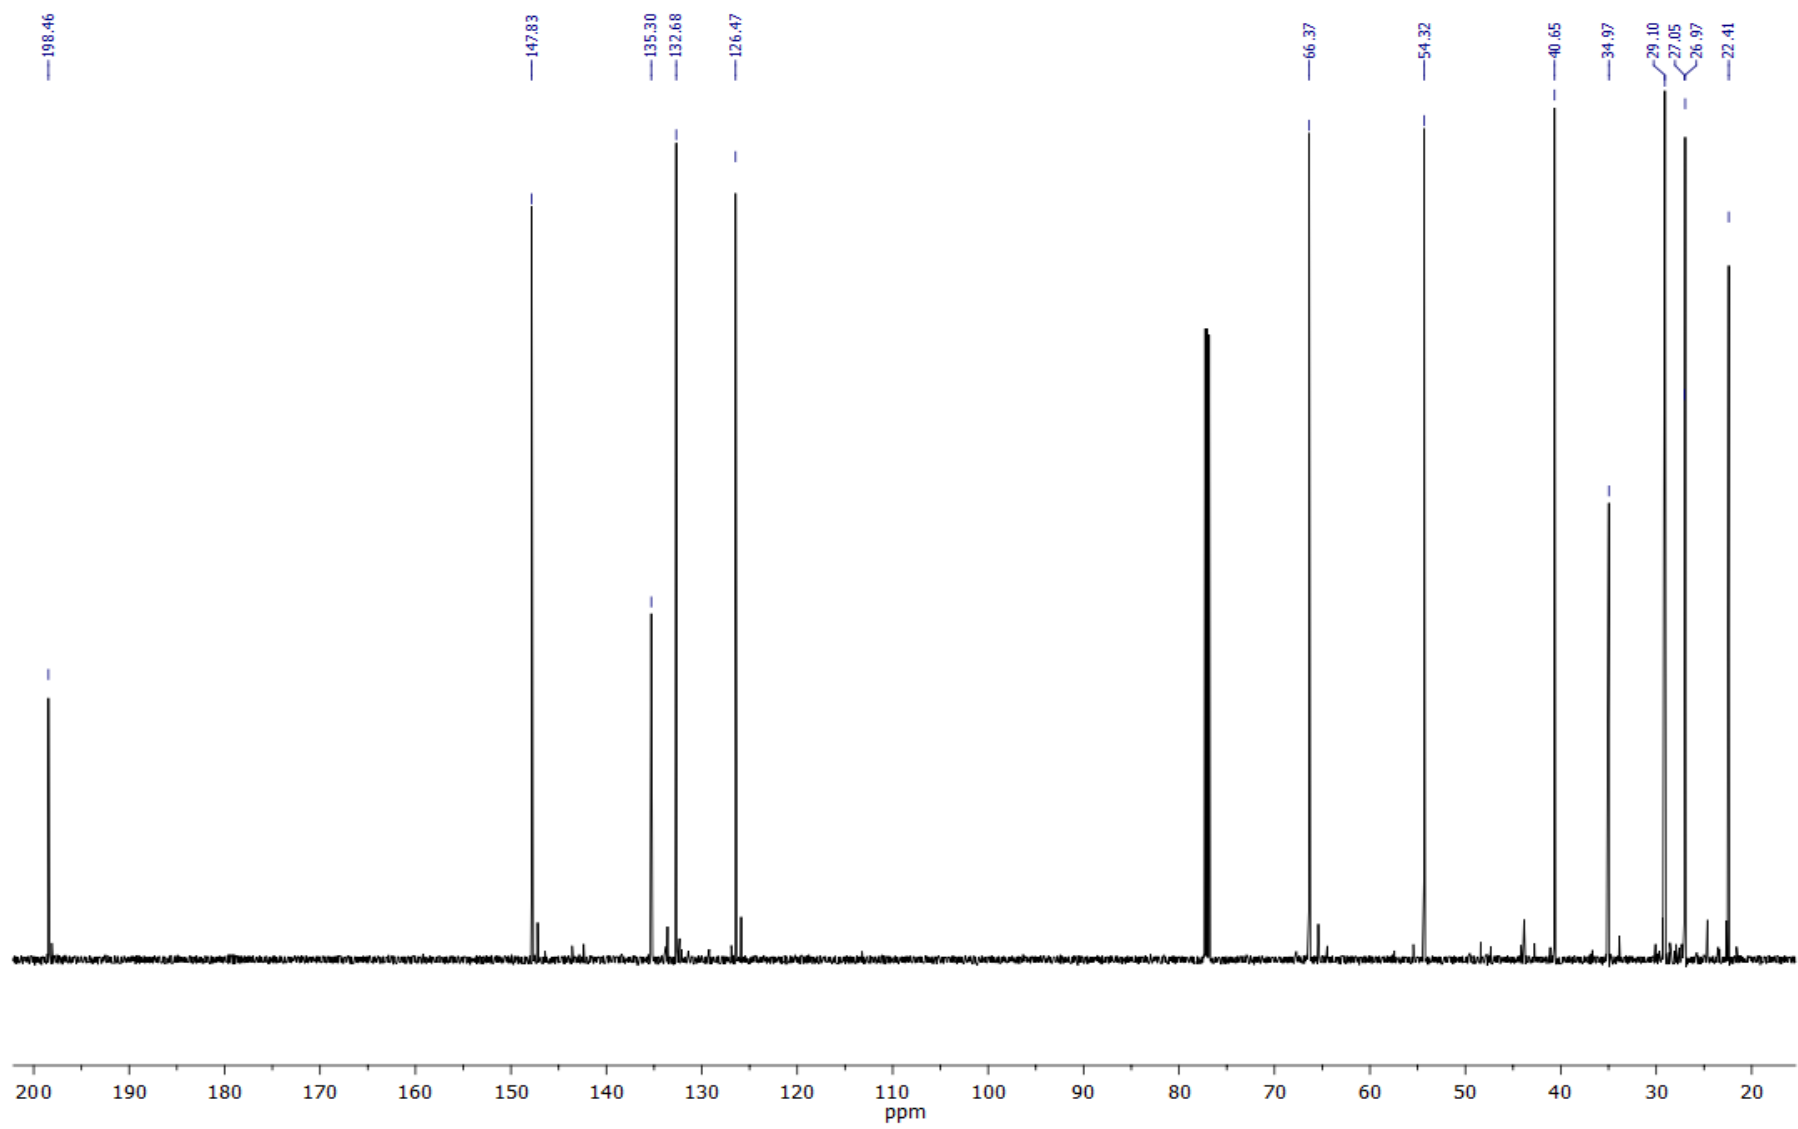

*cis*-3-hydroxy- $\alpha$ -ionone  $^{13}\text{C}$ -NMR

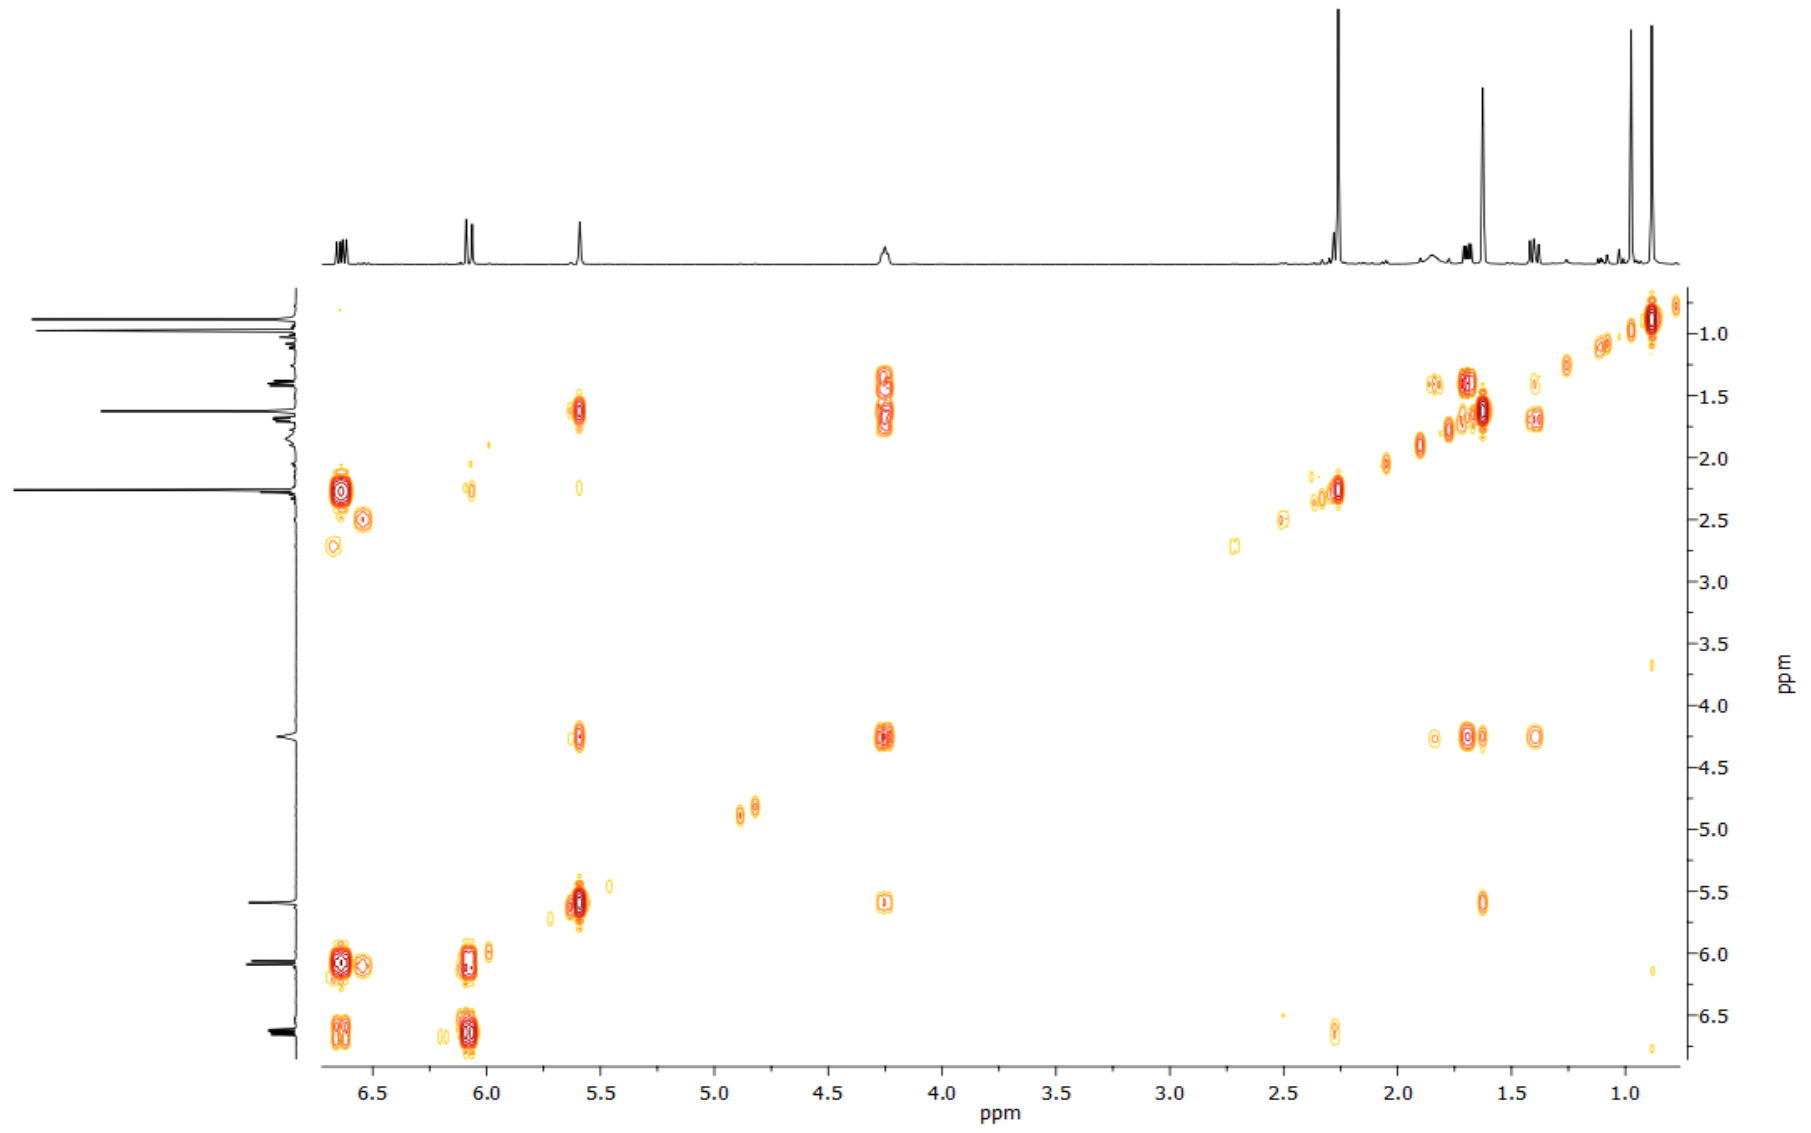

*cis*-3-hydroxy- $\alpha$ -ionone COSY

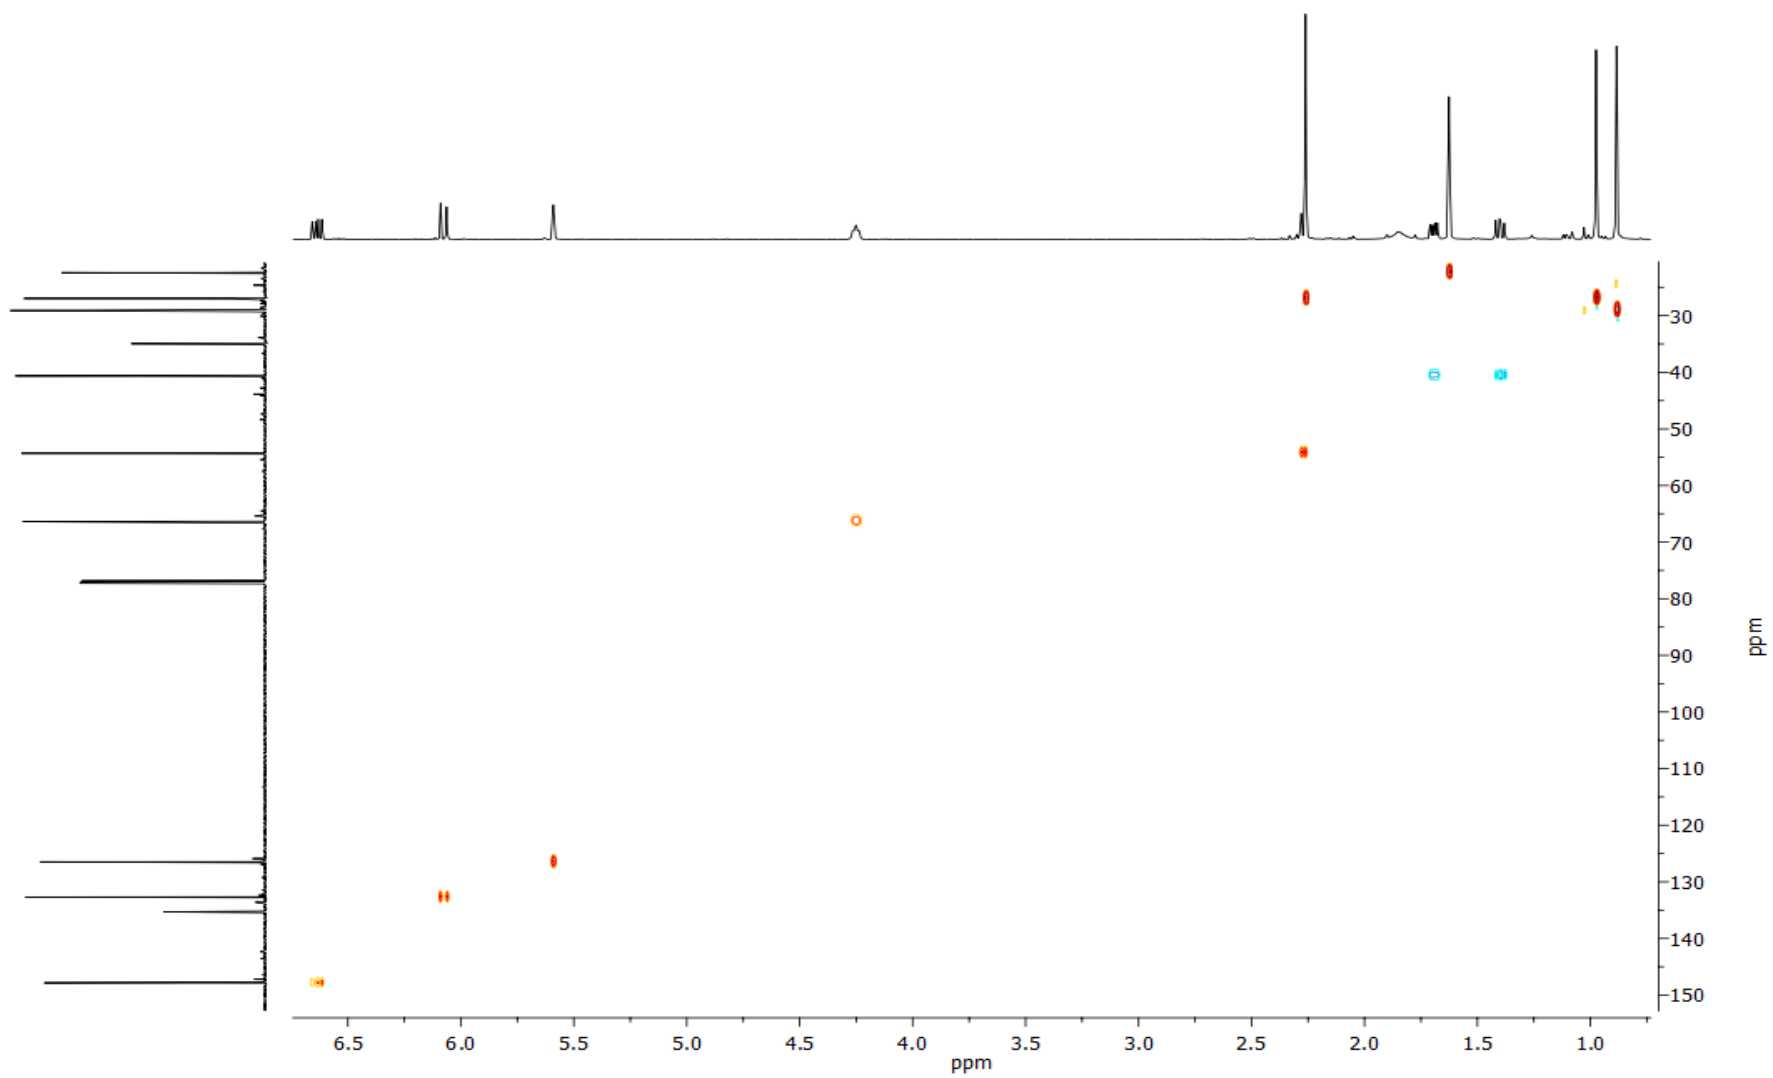

*cis*-3-hydroxy- $\alpha$ -ionone HSQC

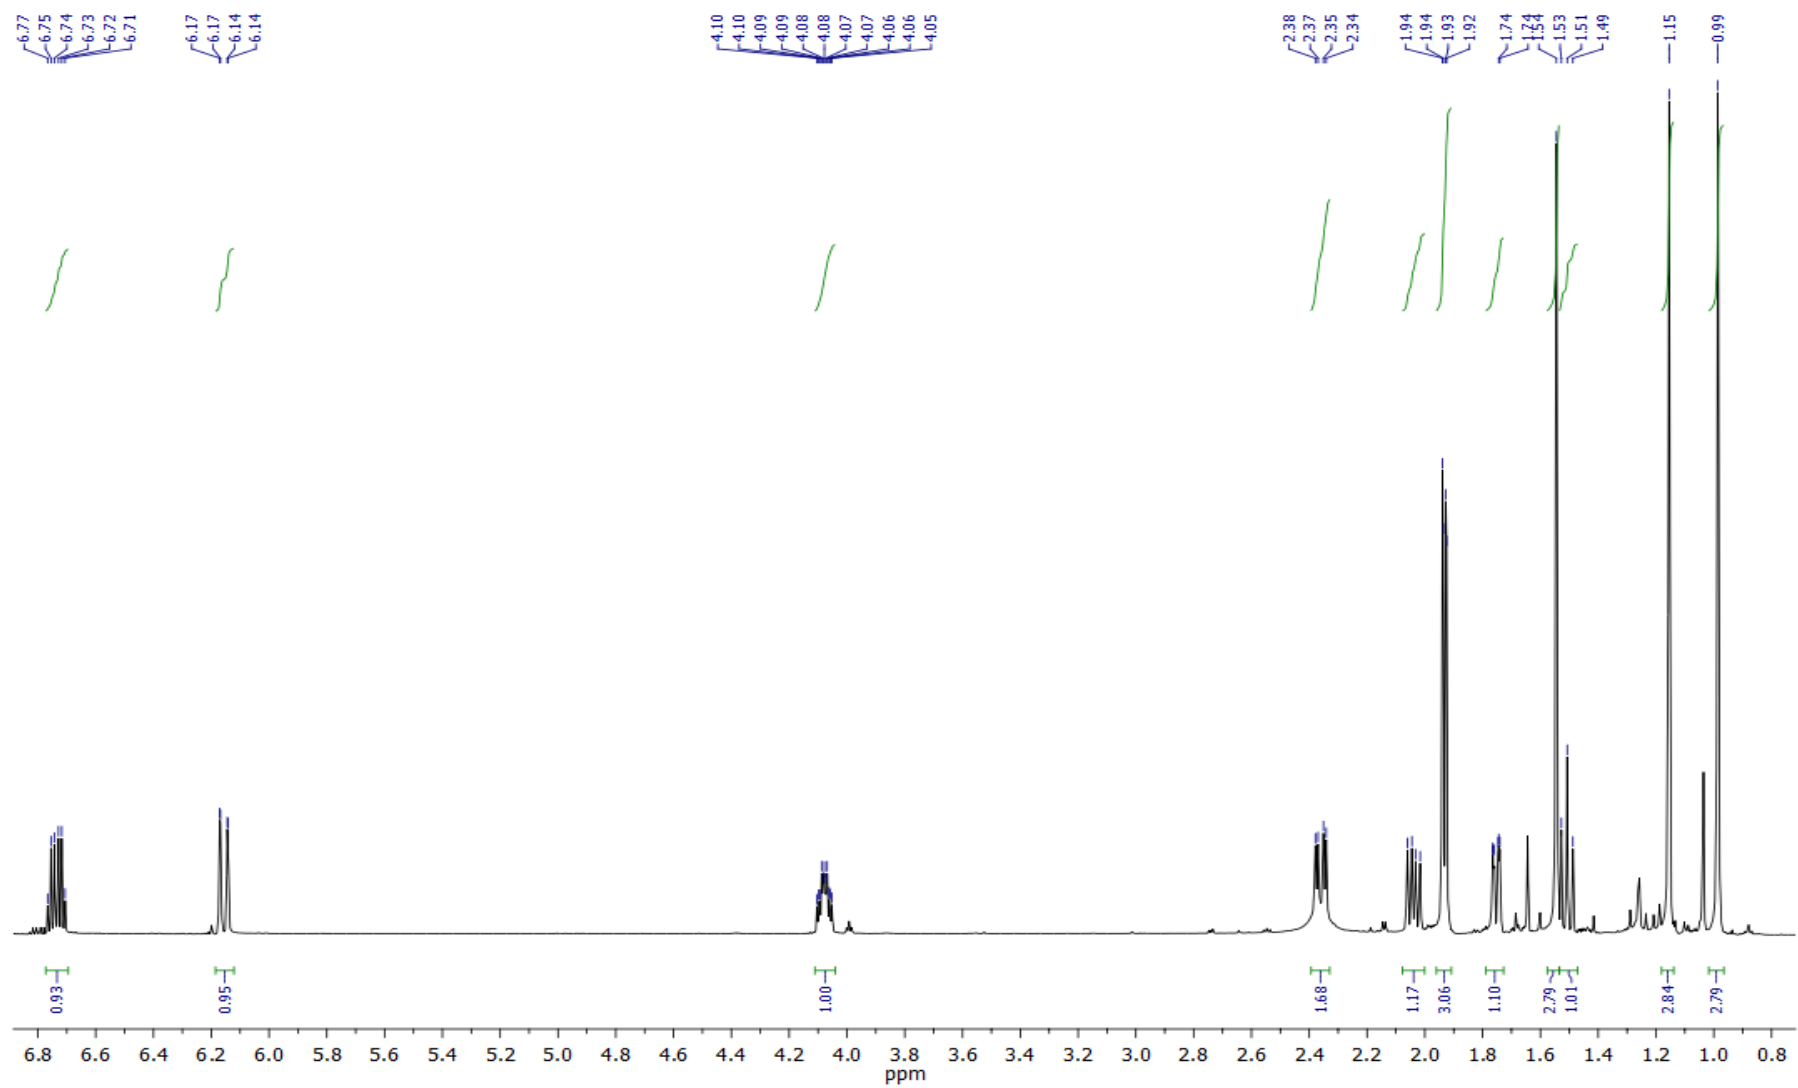

$^1\text{H-NMR}$  for 3-hydroxy- $\beta$ -damascone

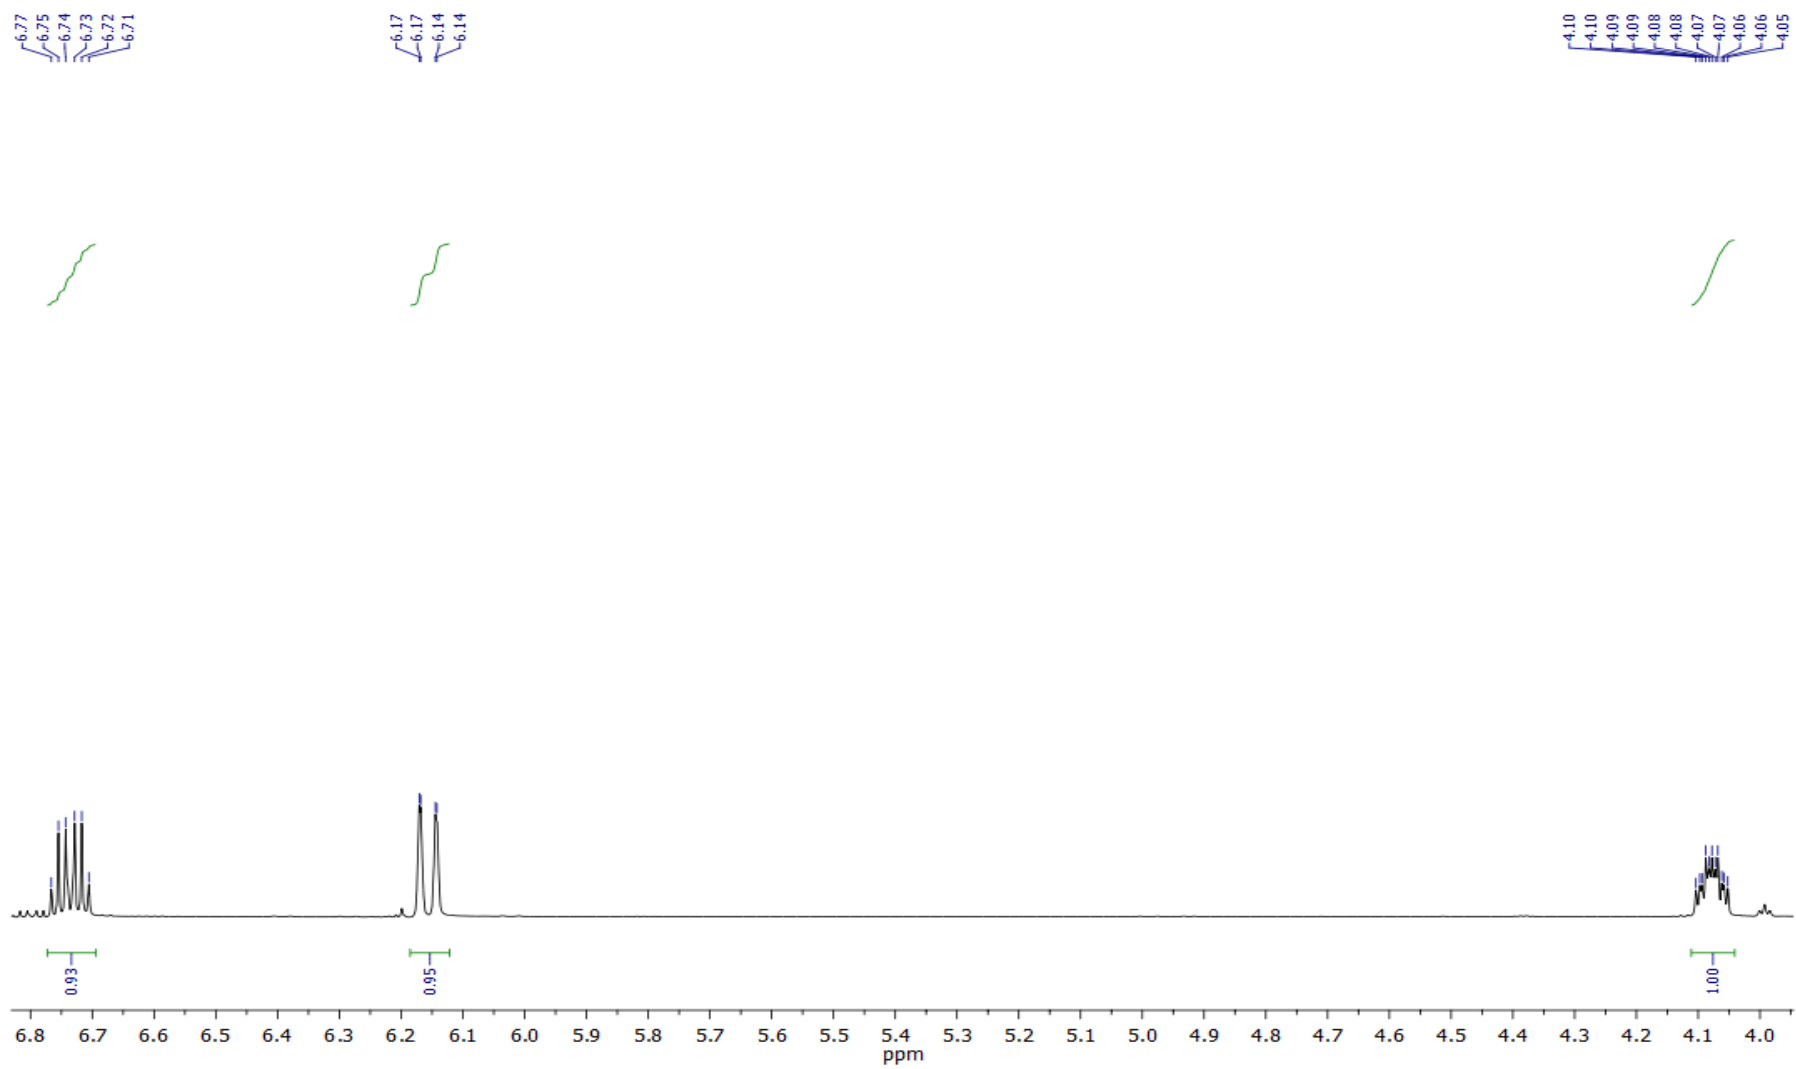

$^1\text{H-NMR}$  of  $\text{sp}^2$  carbons for 3-hydroxy- $\beta$ -damascone

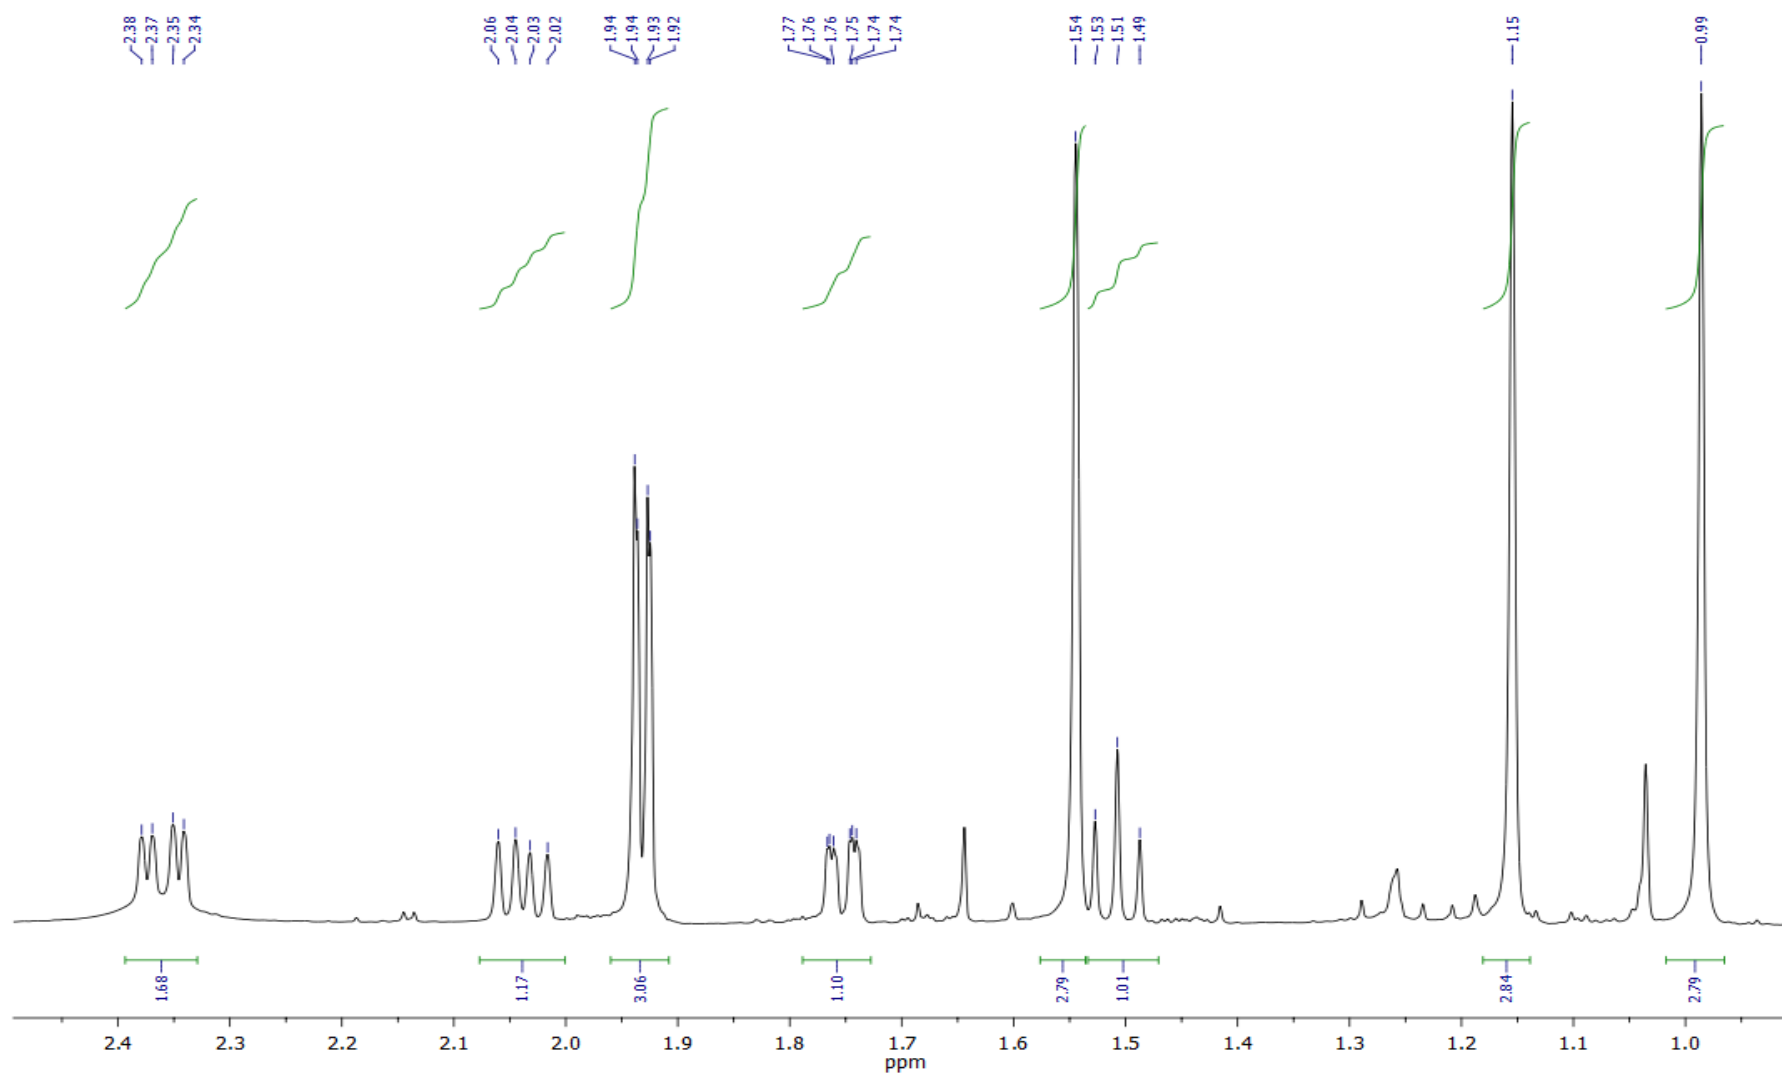

$^1\text{H-NMR}$  of  $\text{sp}^3$  carbons for 3-hydroxy- $\beta$ -damascone

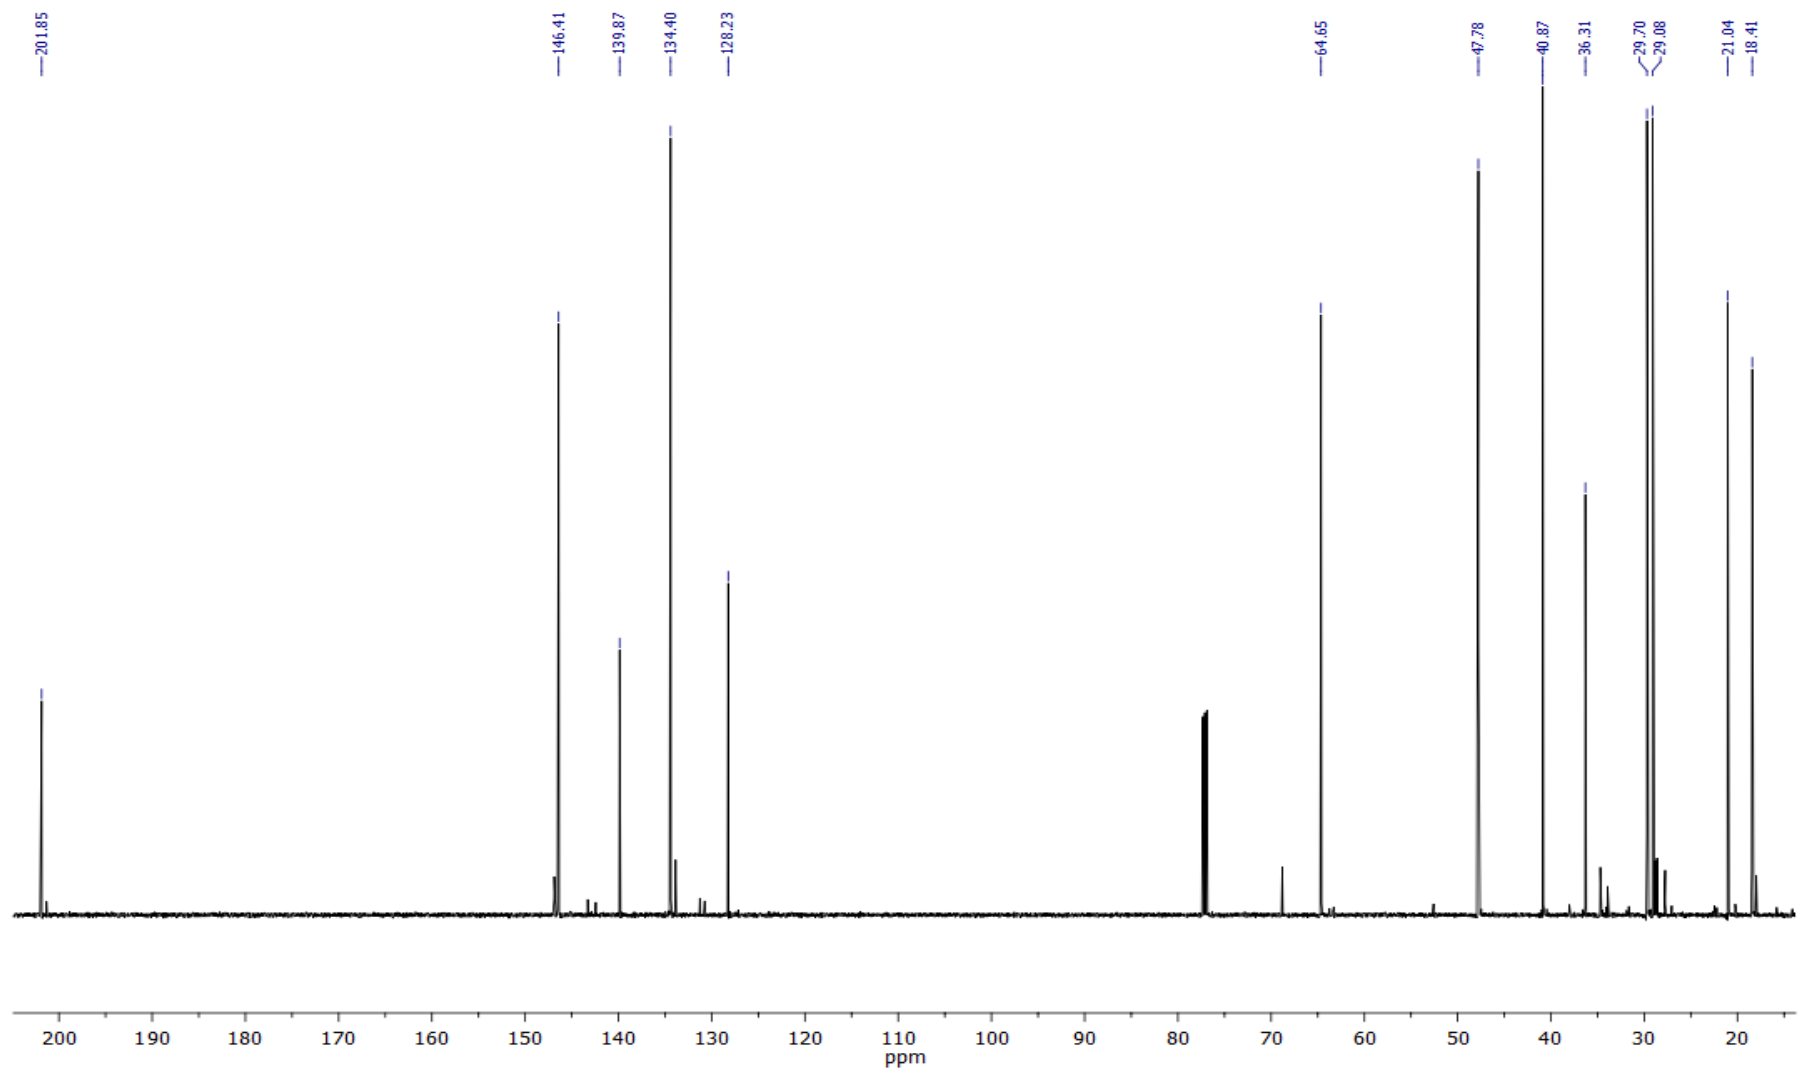

<sup>13</sup>C NMR for 3-hydroxy-β-damascone



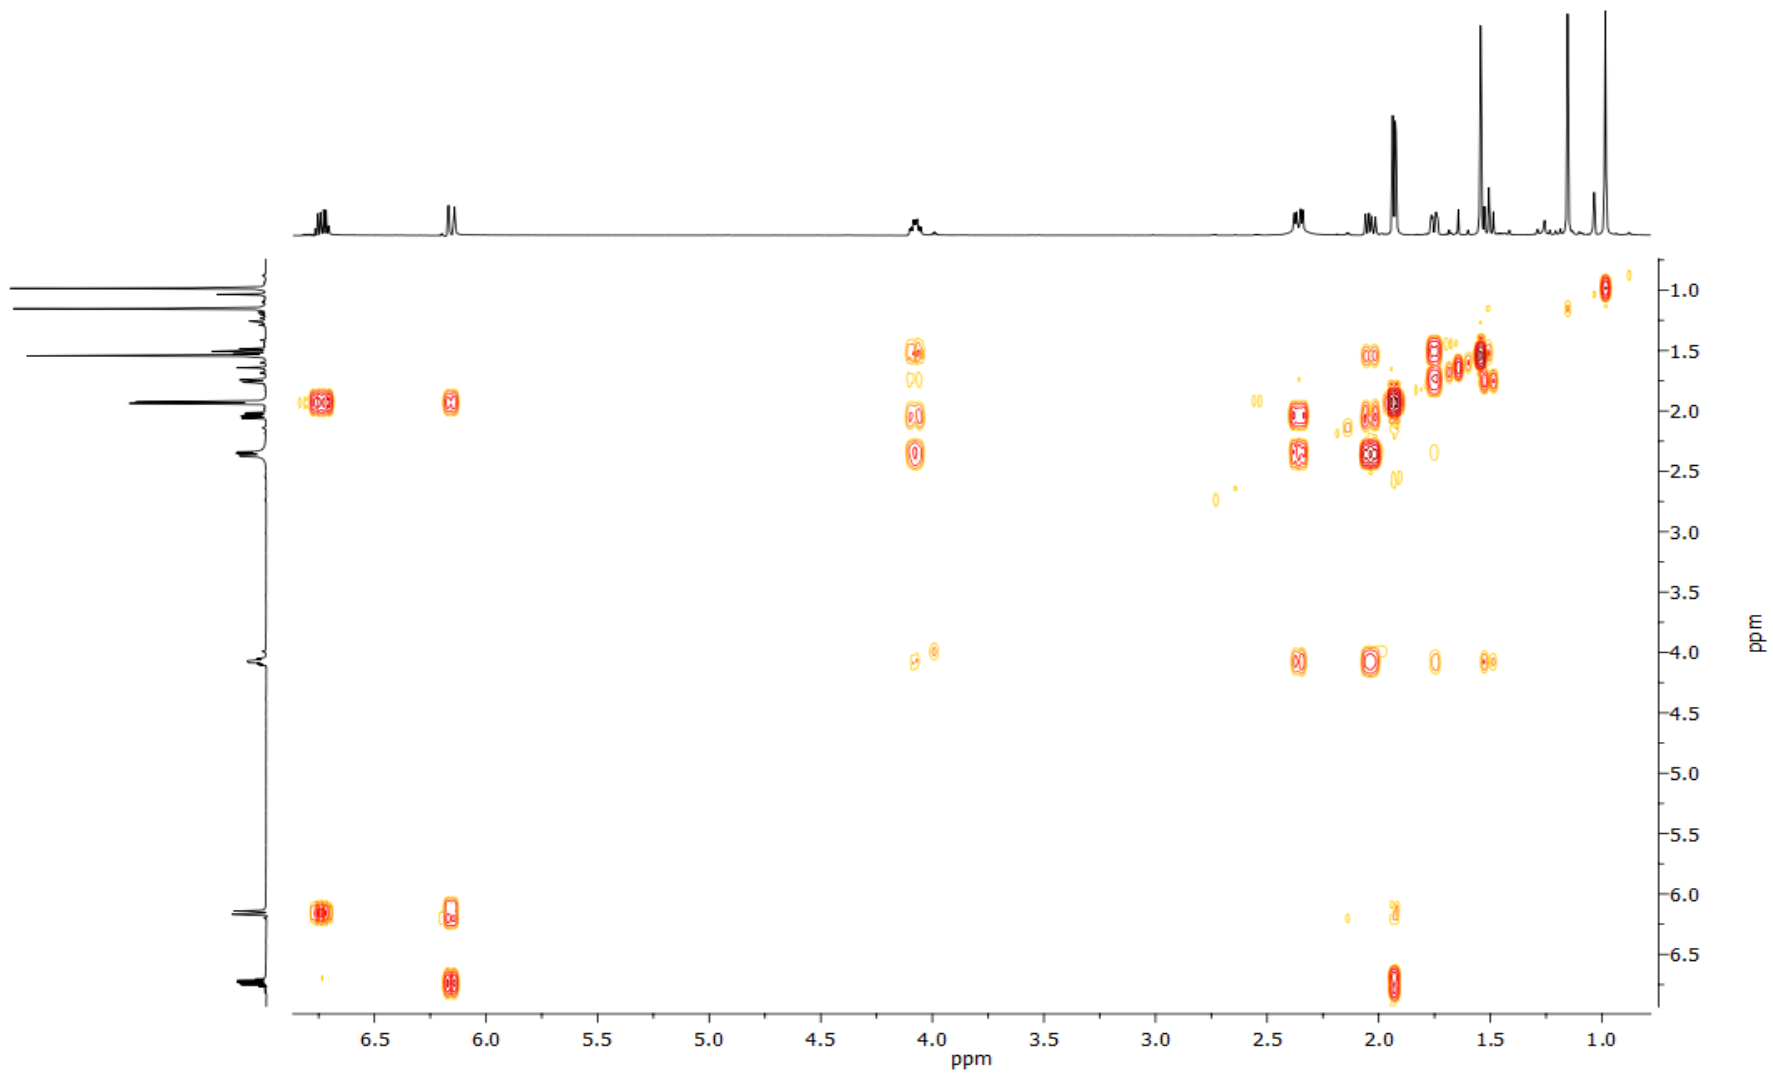

COSY-NMR for 3-hydroxy- $\beta$ -damascone

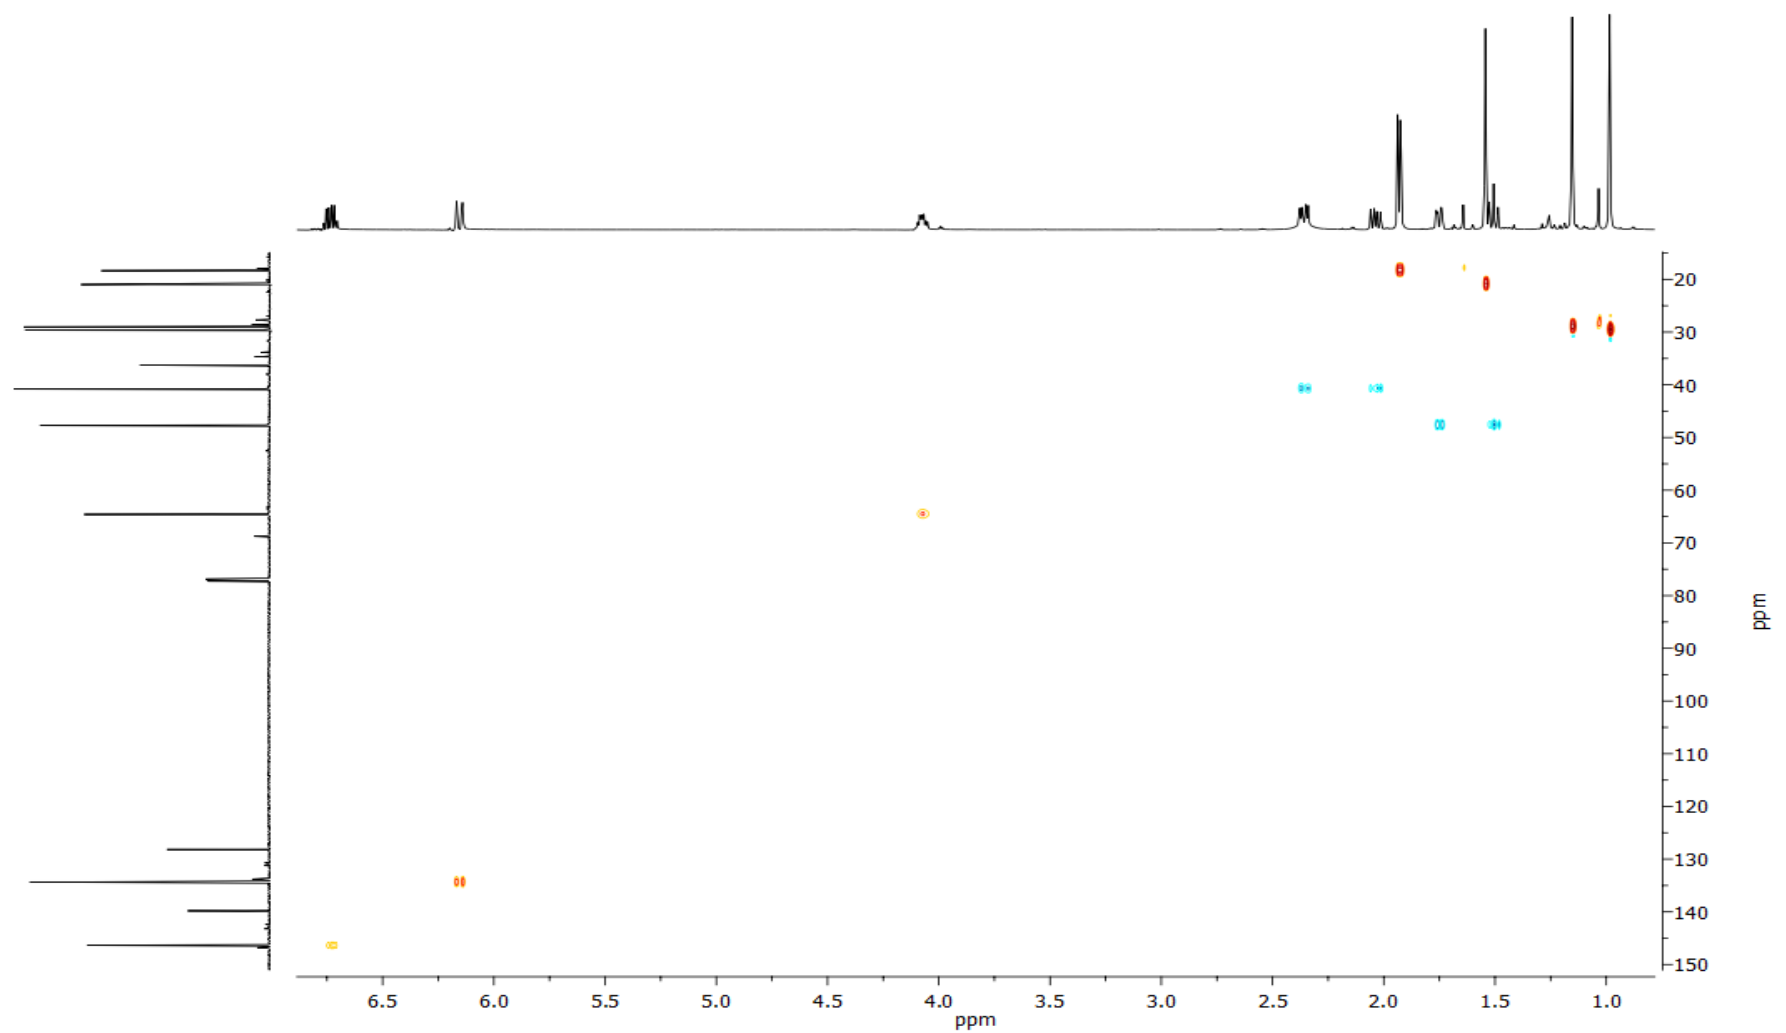

HSQC-NMR for 3-hydroxy- $\beta$ -damascone

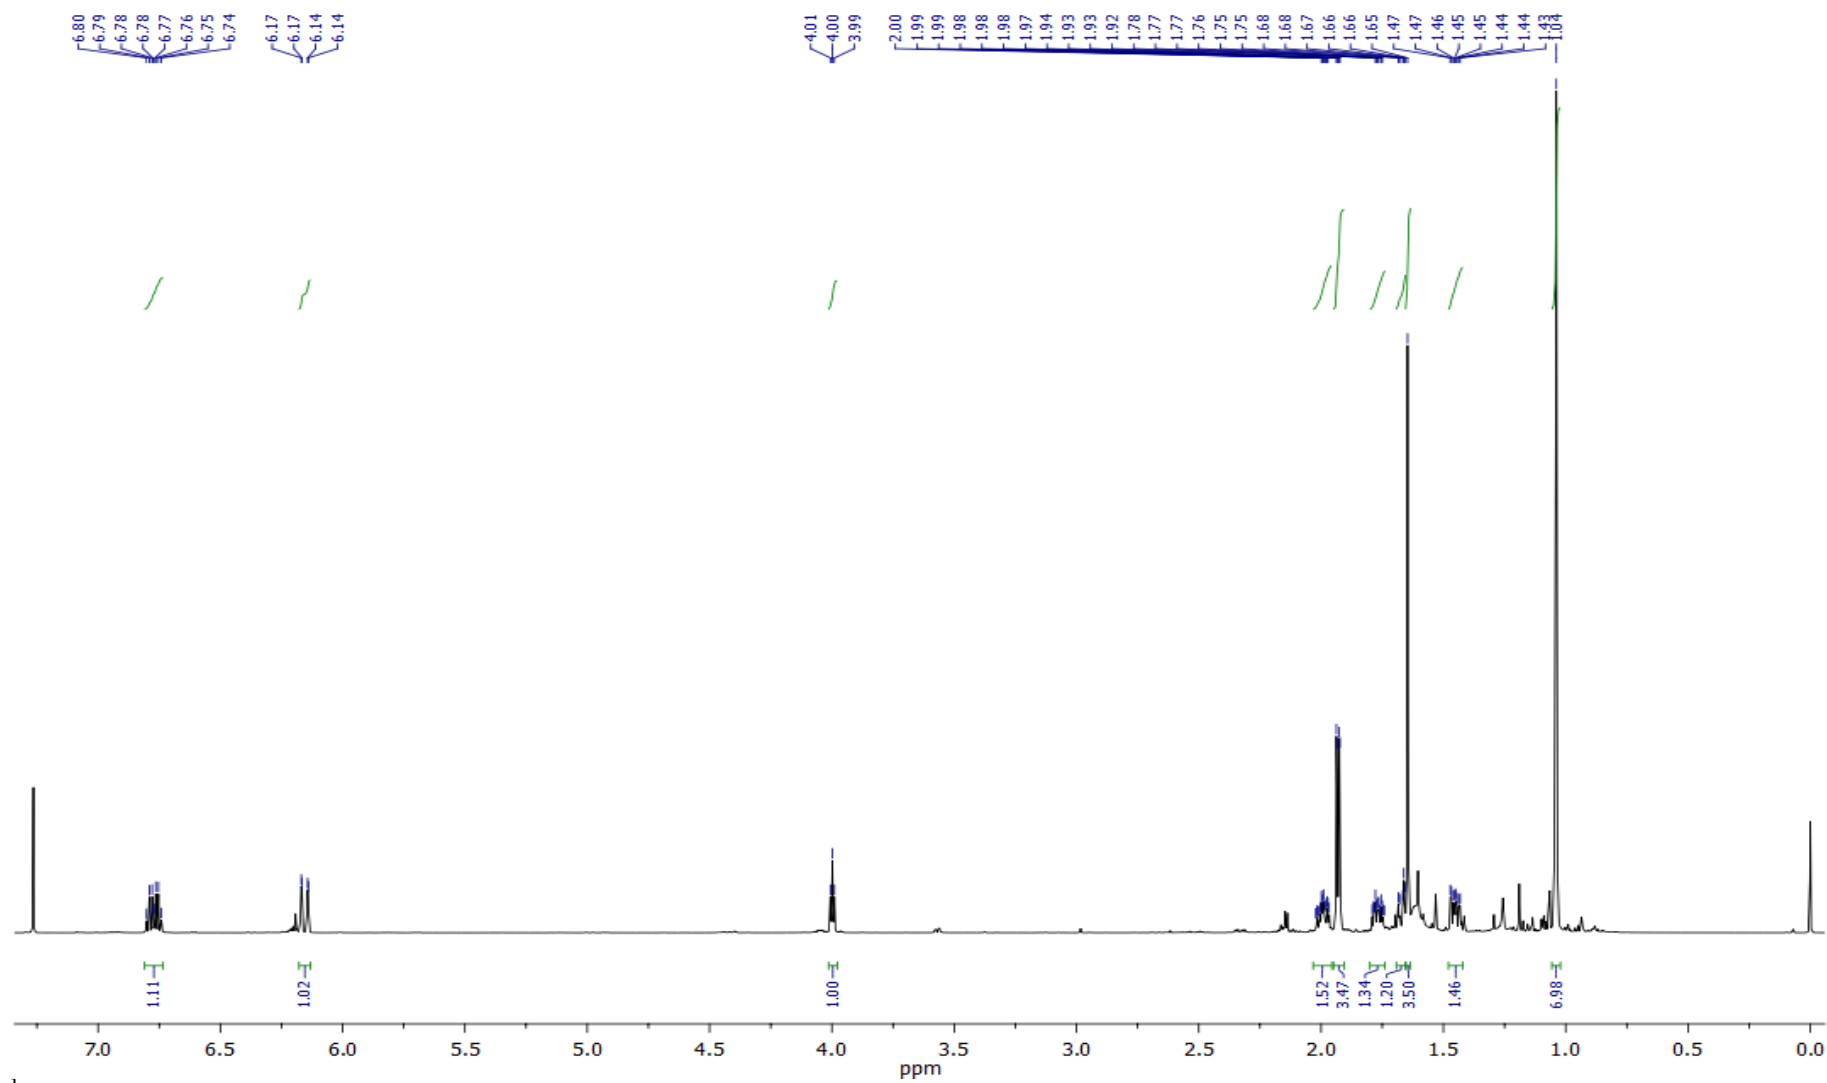

<sup>1</sup>H NMR for 4-hydroxy-β-damascone

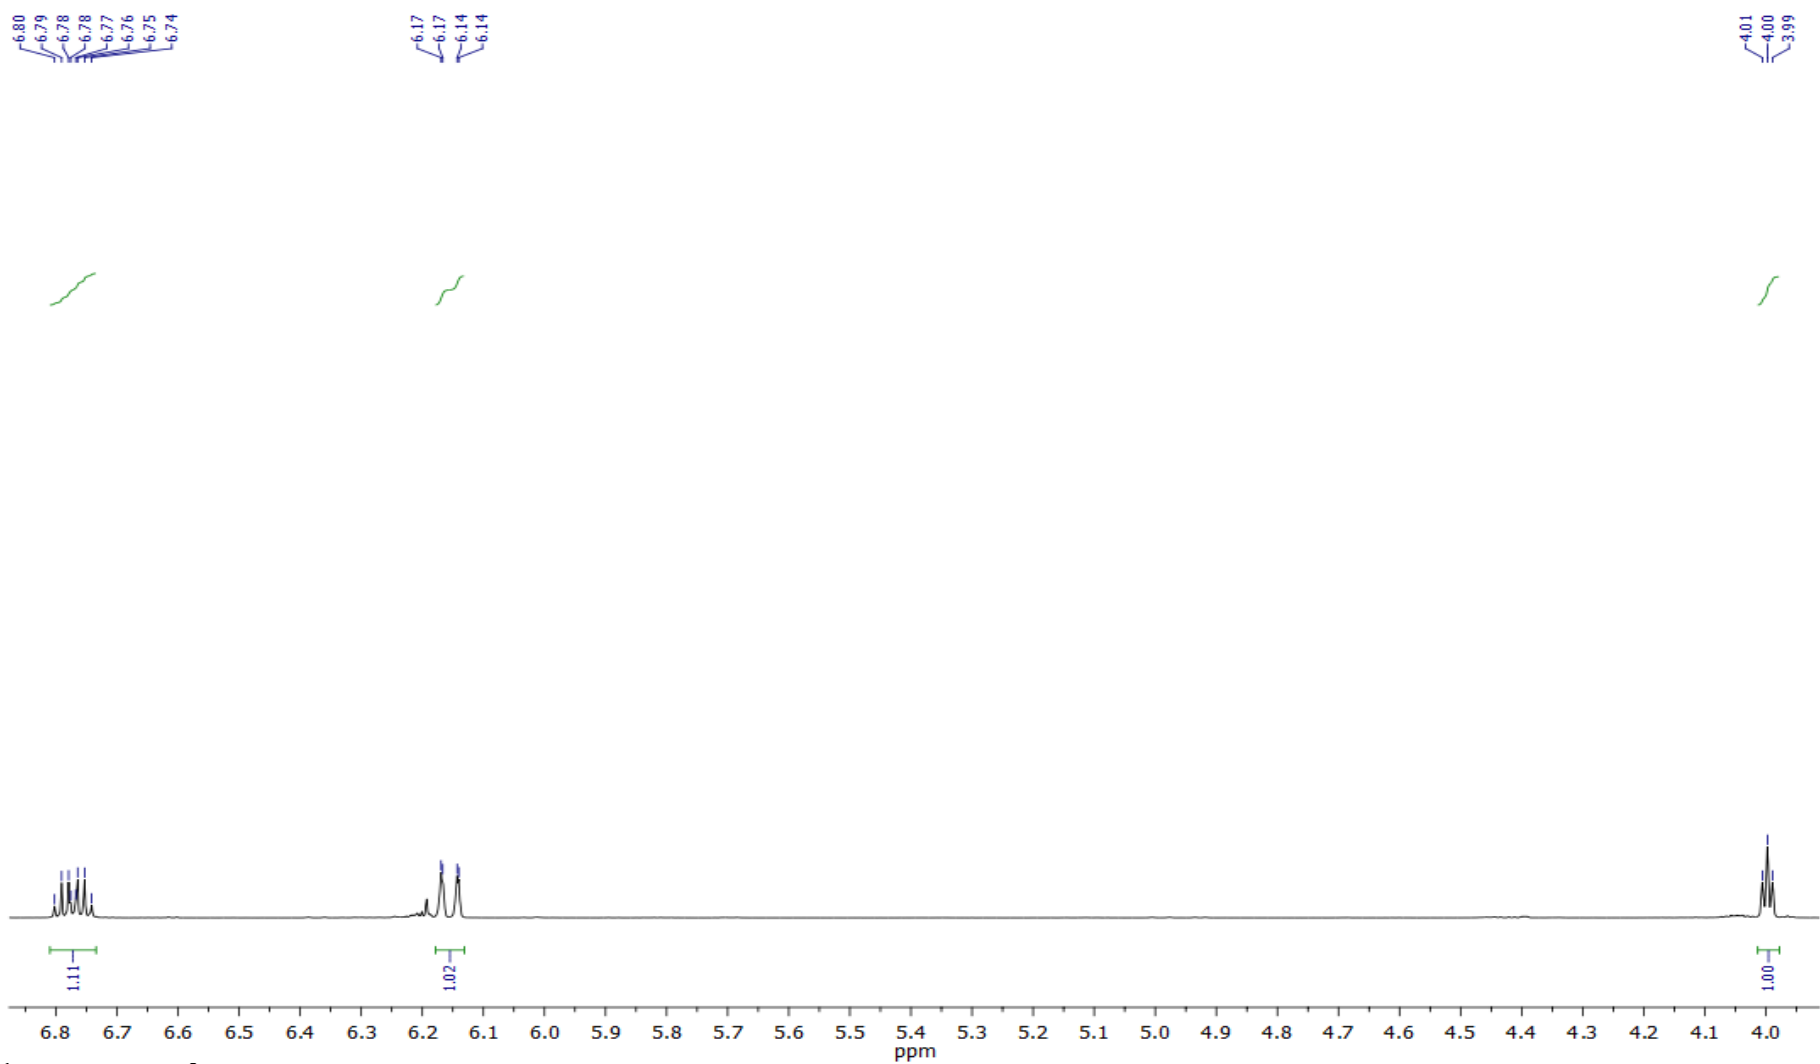

<sup>1</sup>H NMR of sp<sup>2</sup> carbons for 4-hydroxy-β-damascone

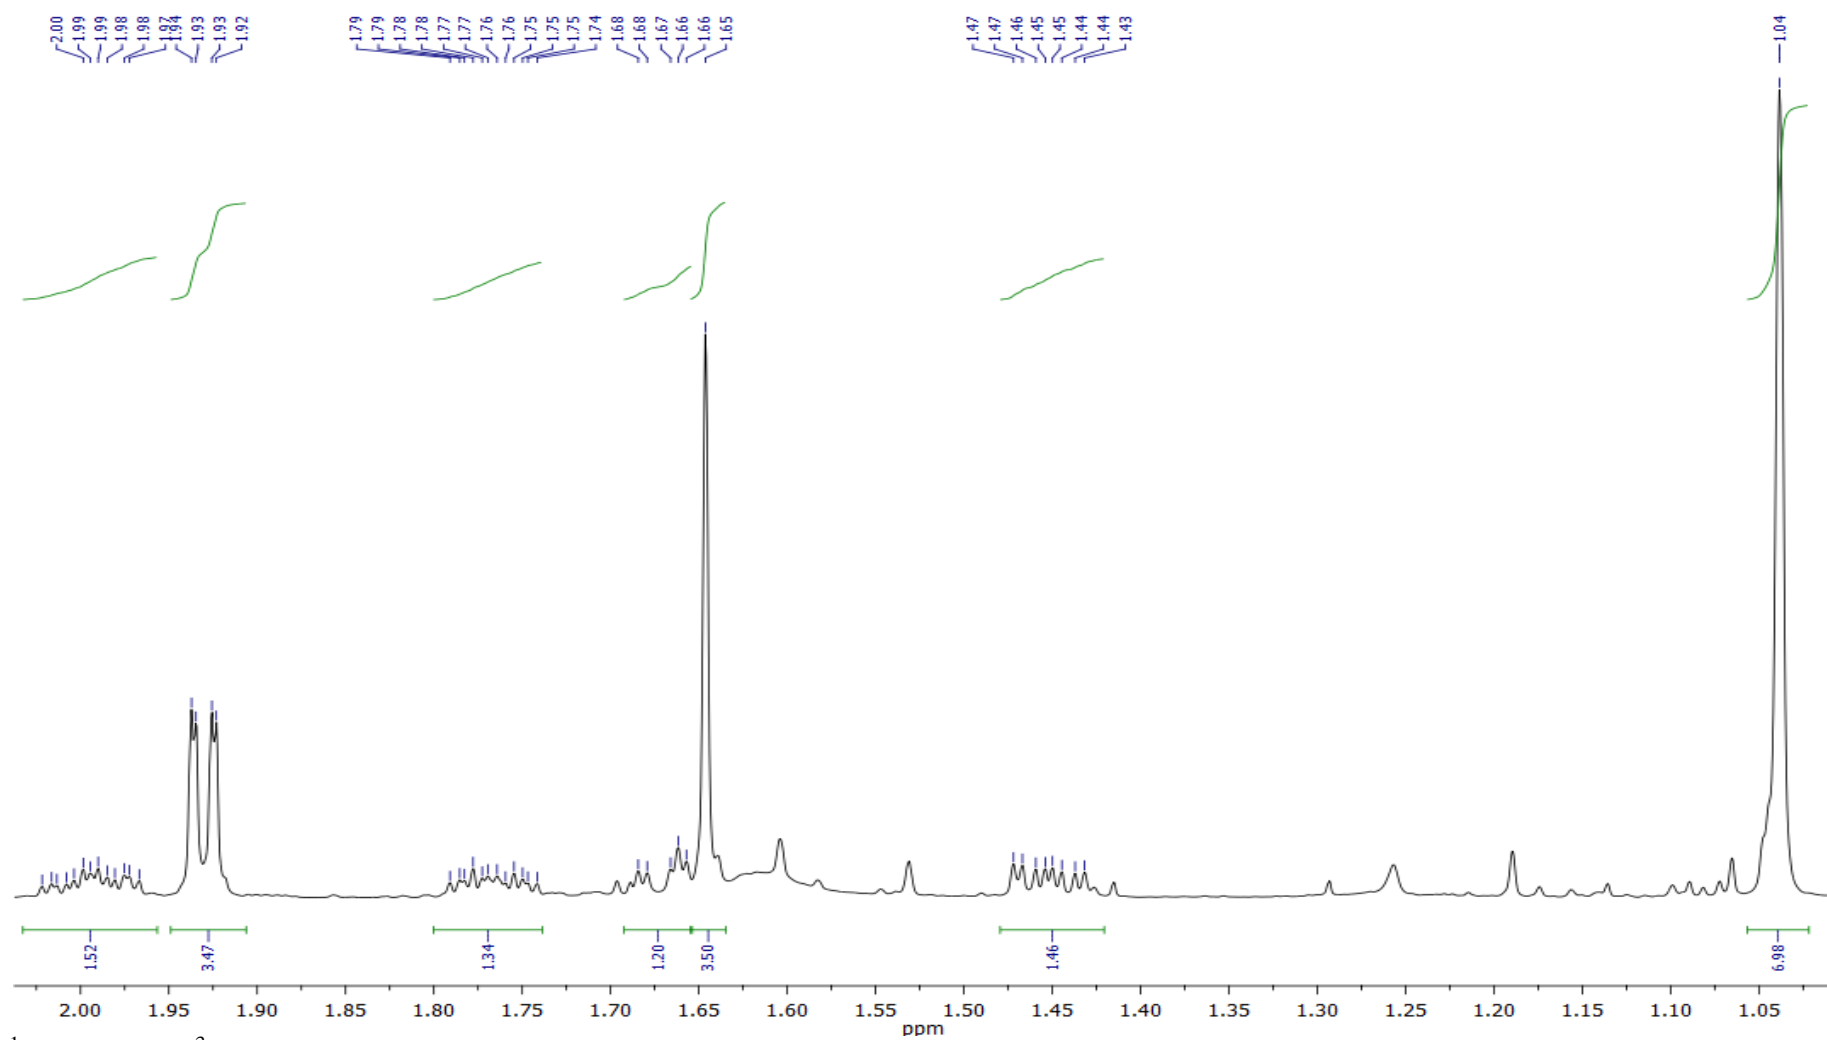

$^1\text{H}$  NMR of  $\text{sp}^3$  carbons for 4-hydroxy- $\beta$ -damascone

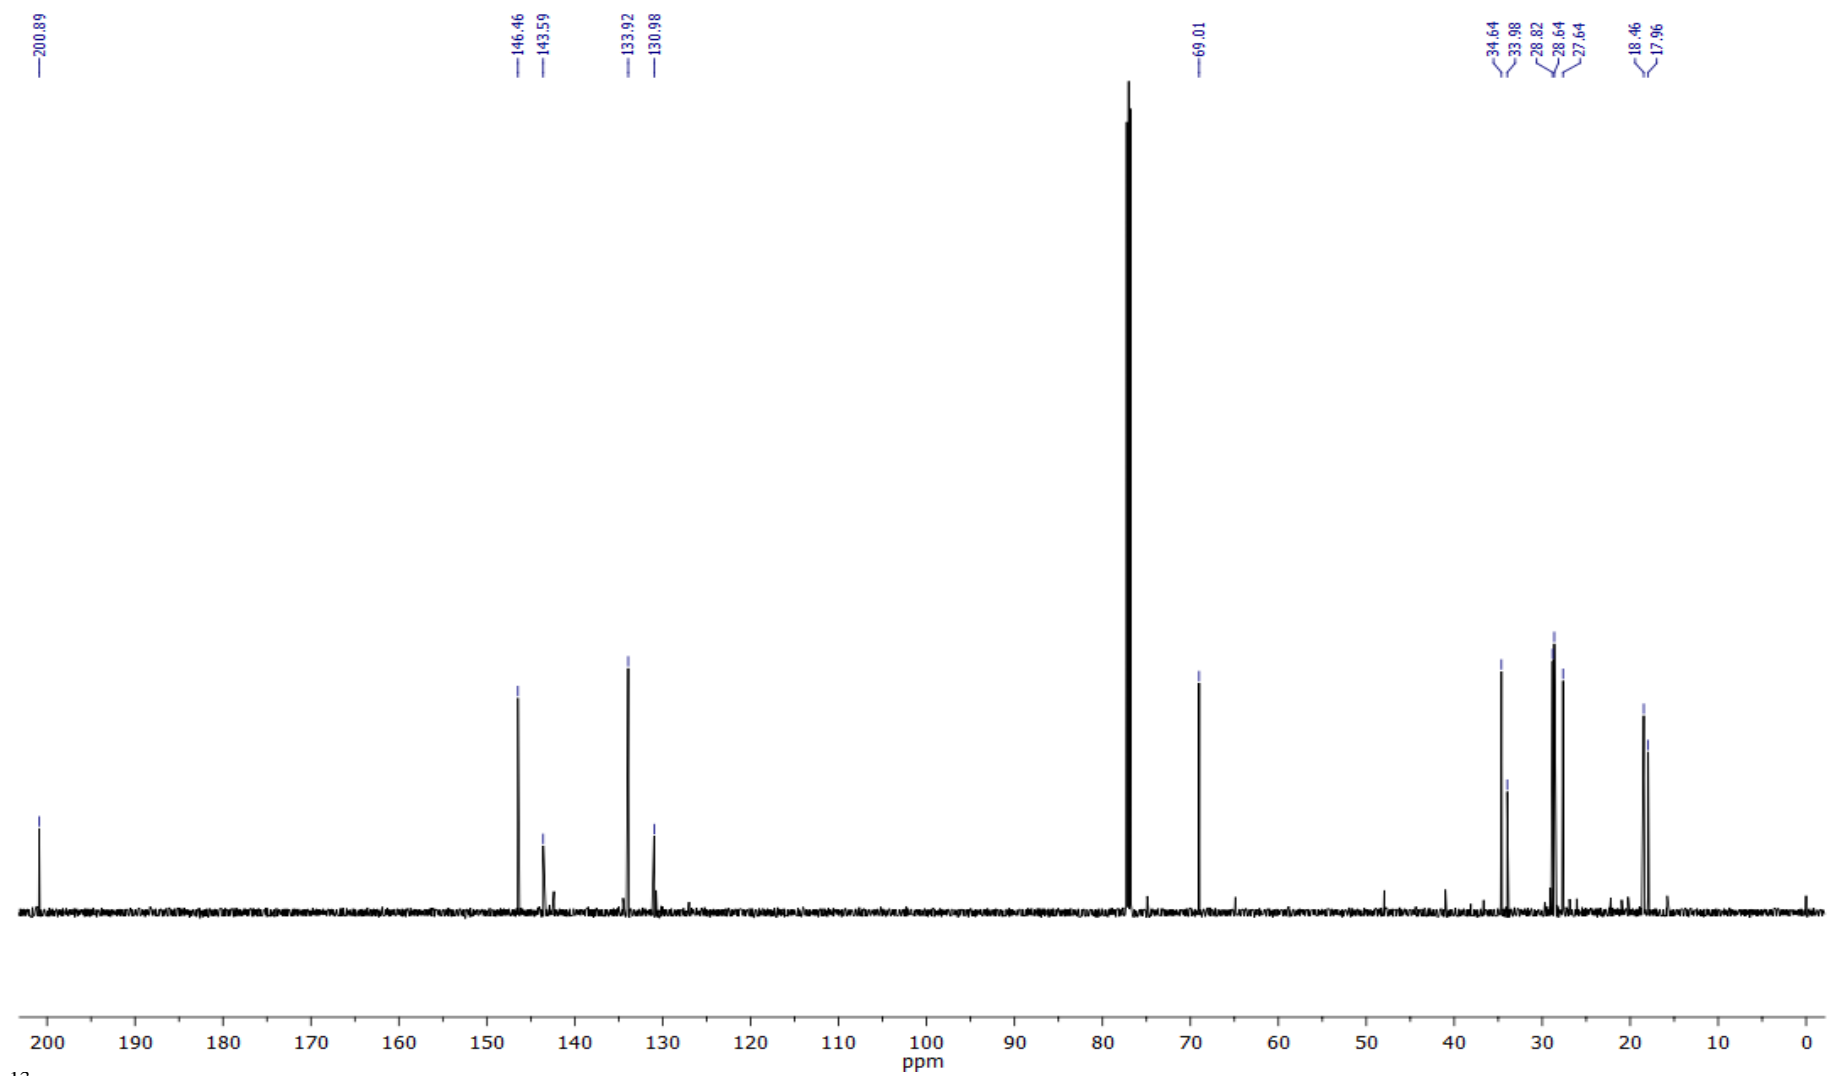

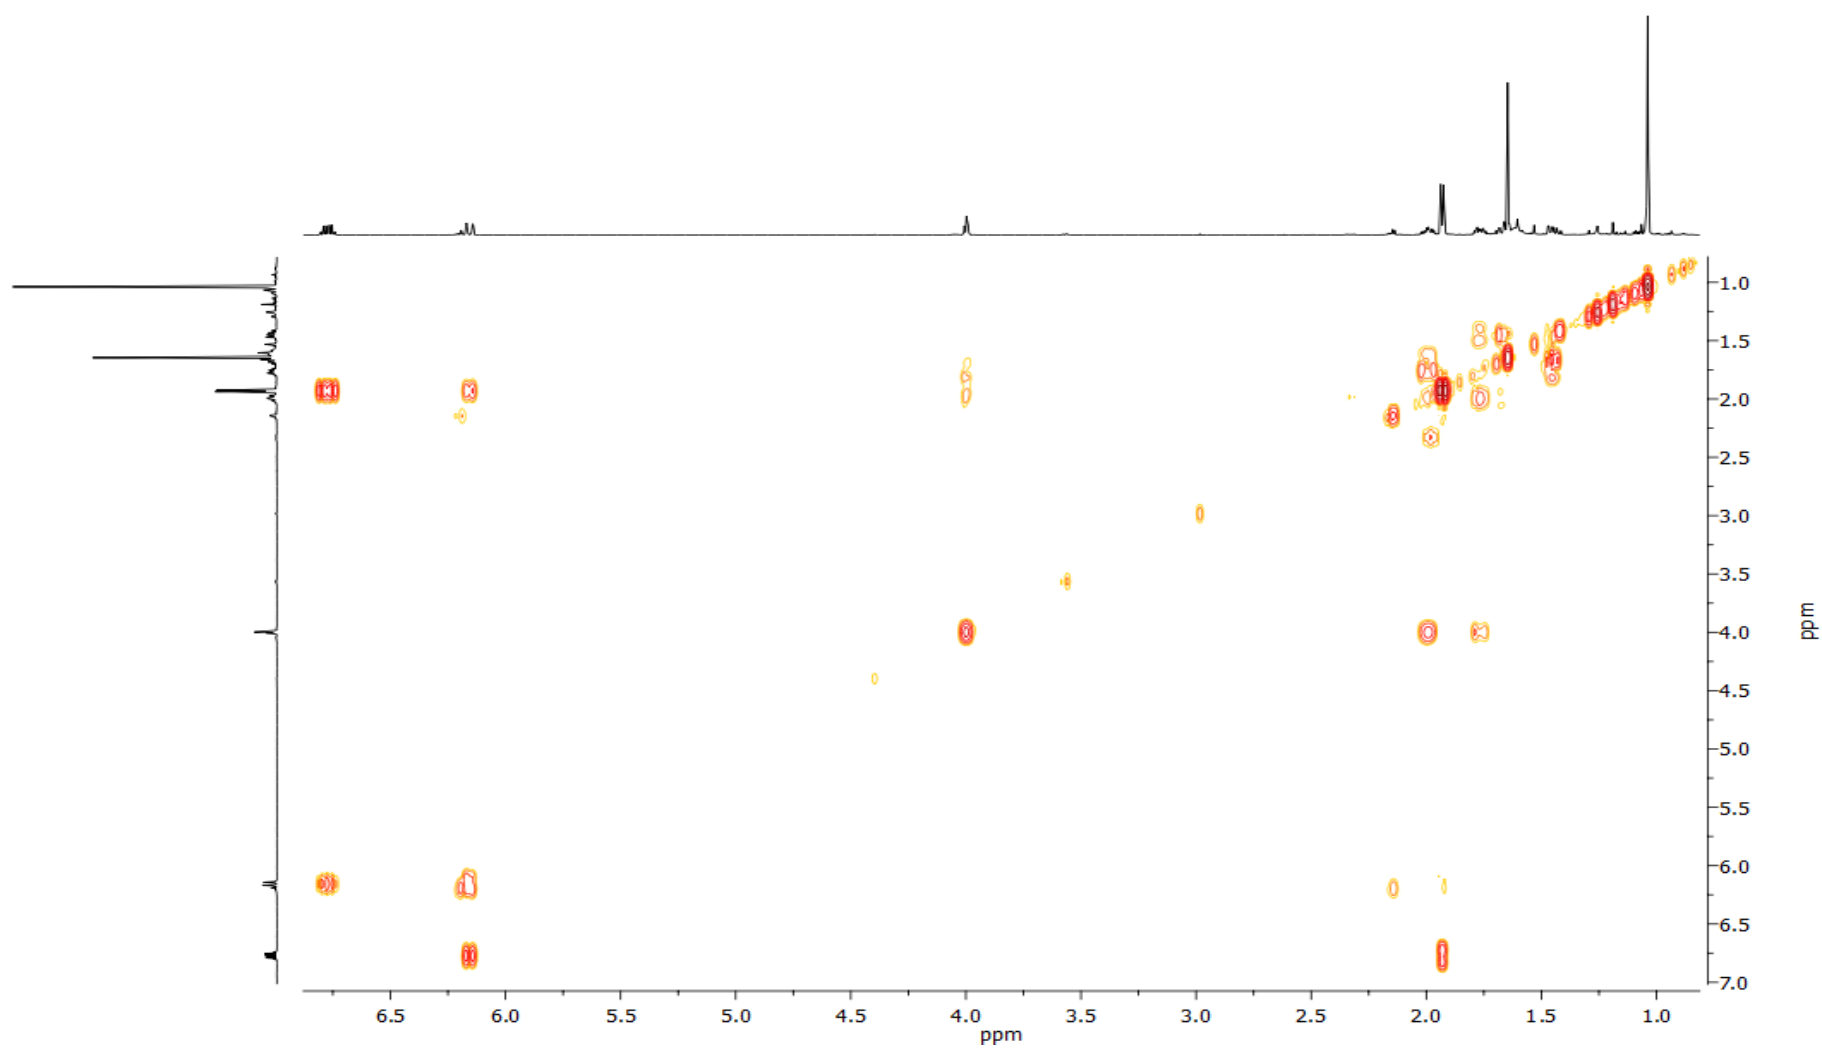

COSY for 4-hydroxy- $\beta$ -damascone

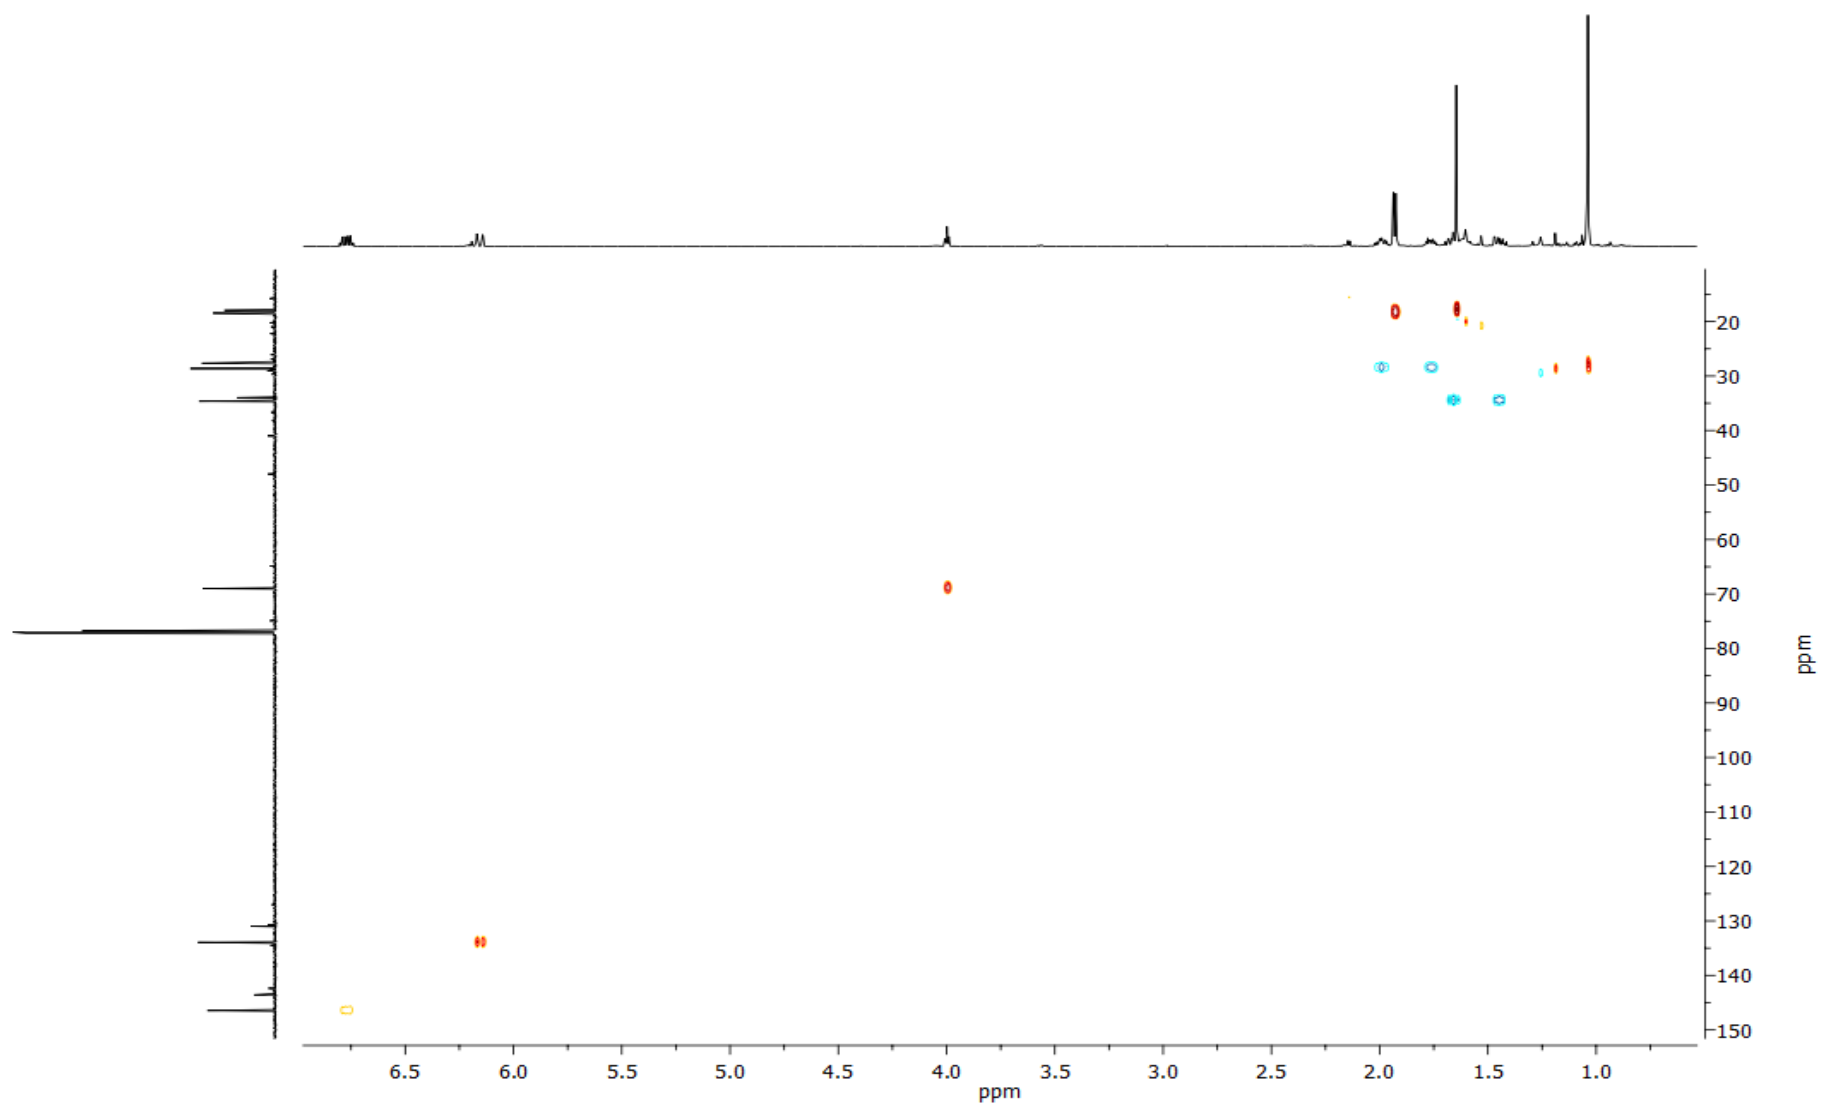

HSQC for 4-hydroxy- $\beta$ -damascone



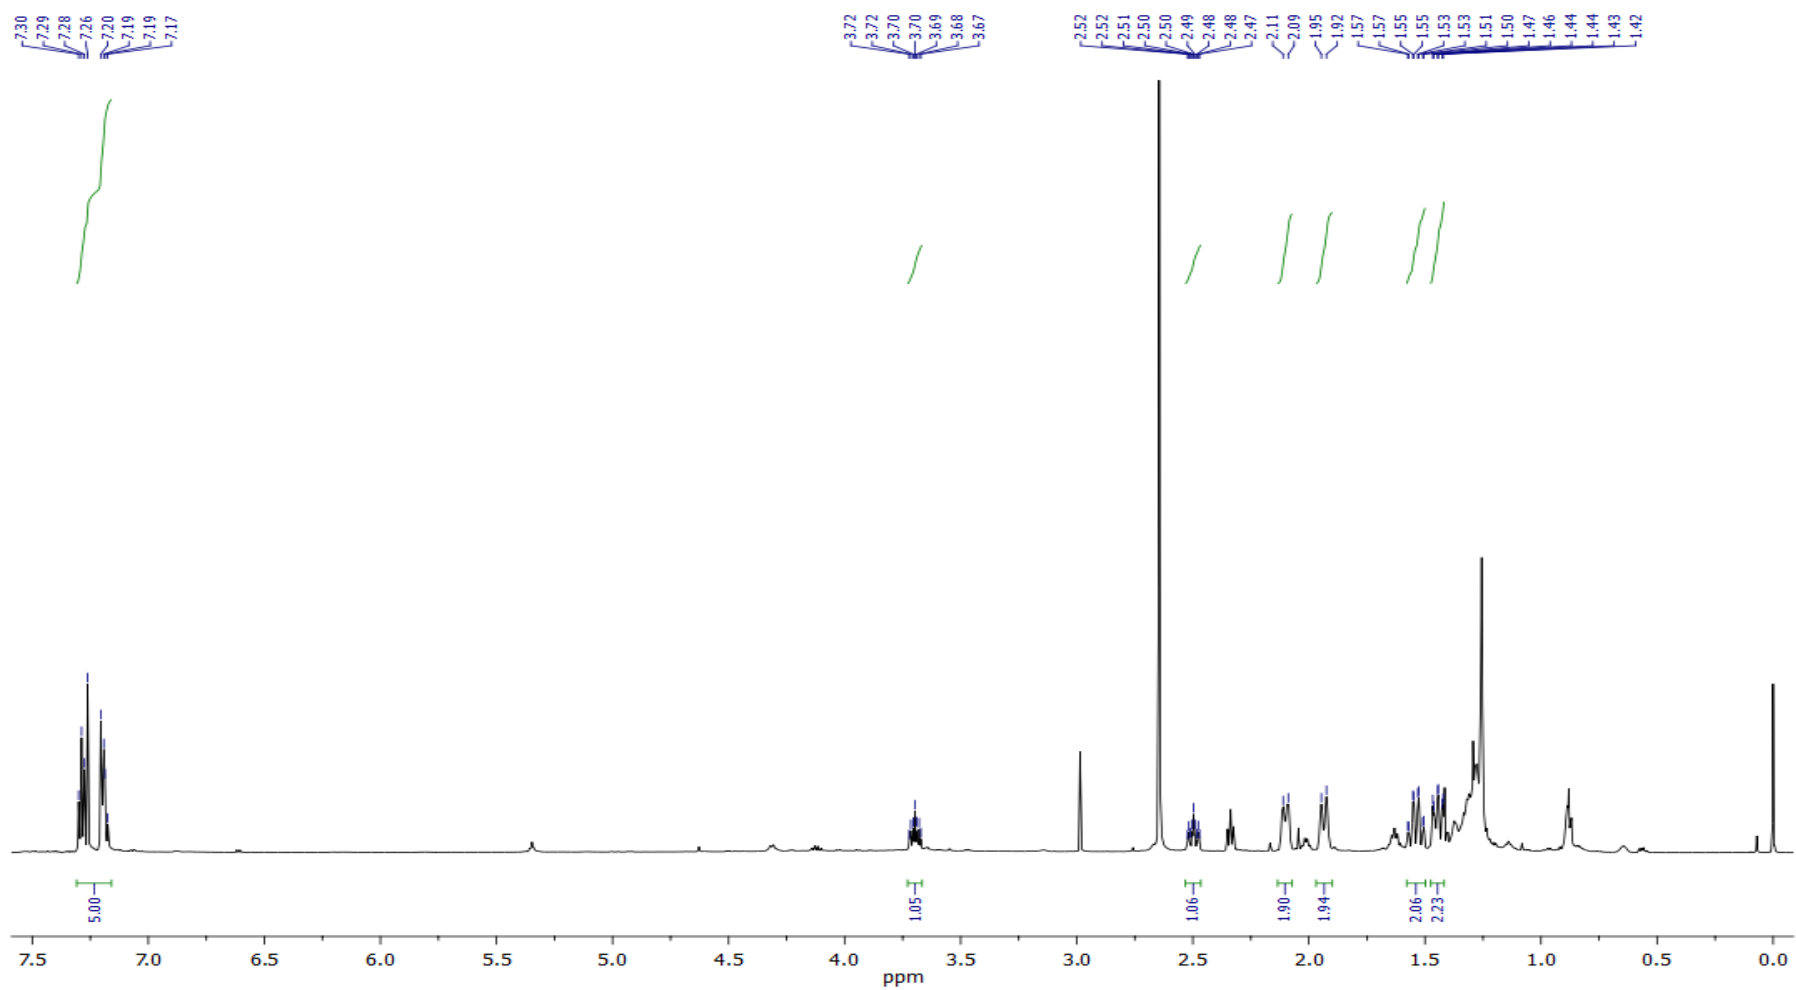

$^1\text{H-NMR}$  of *trans*-4-phenylcyclohexanol

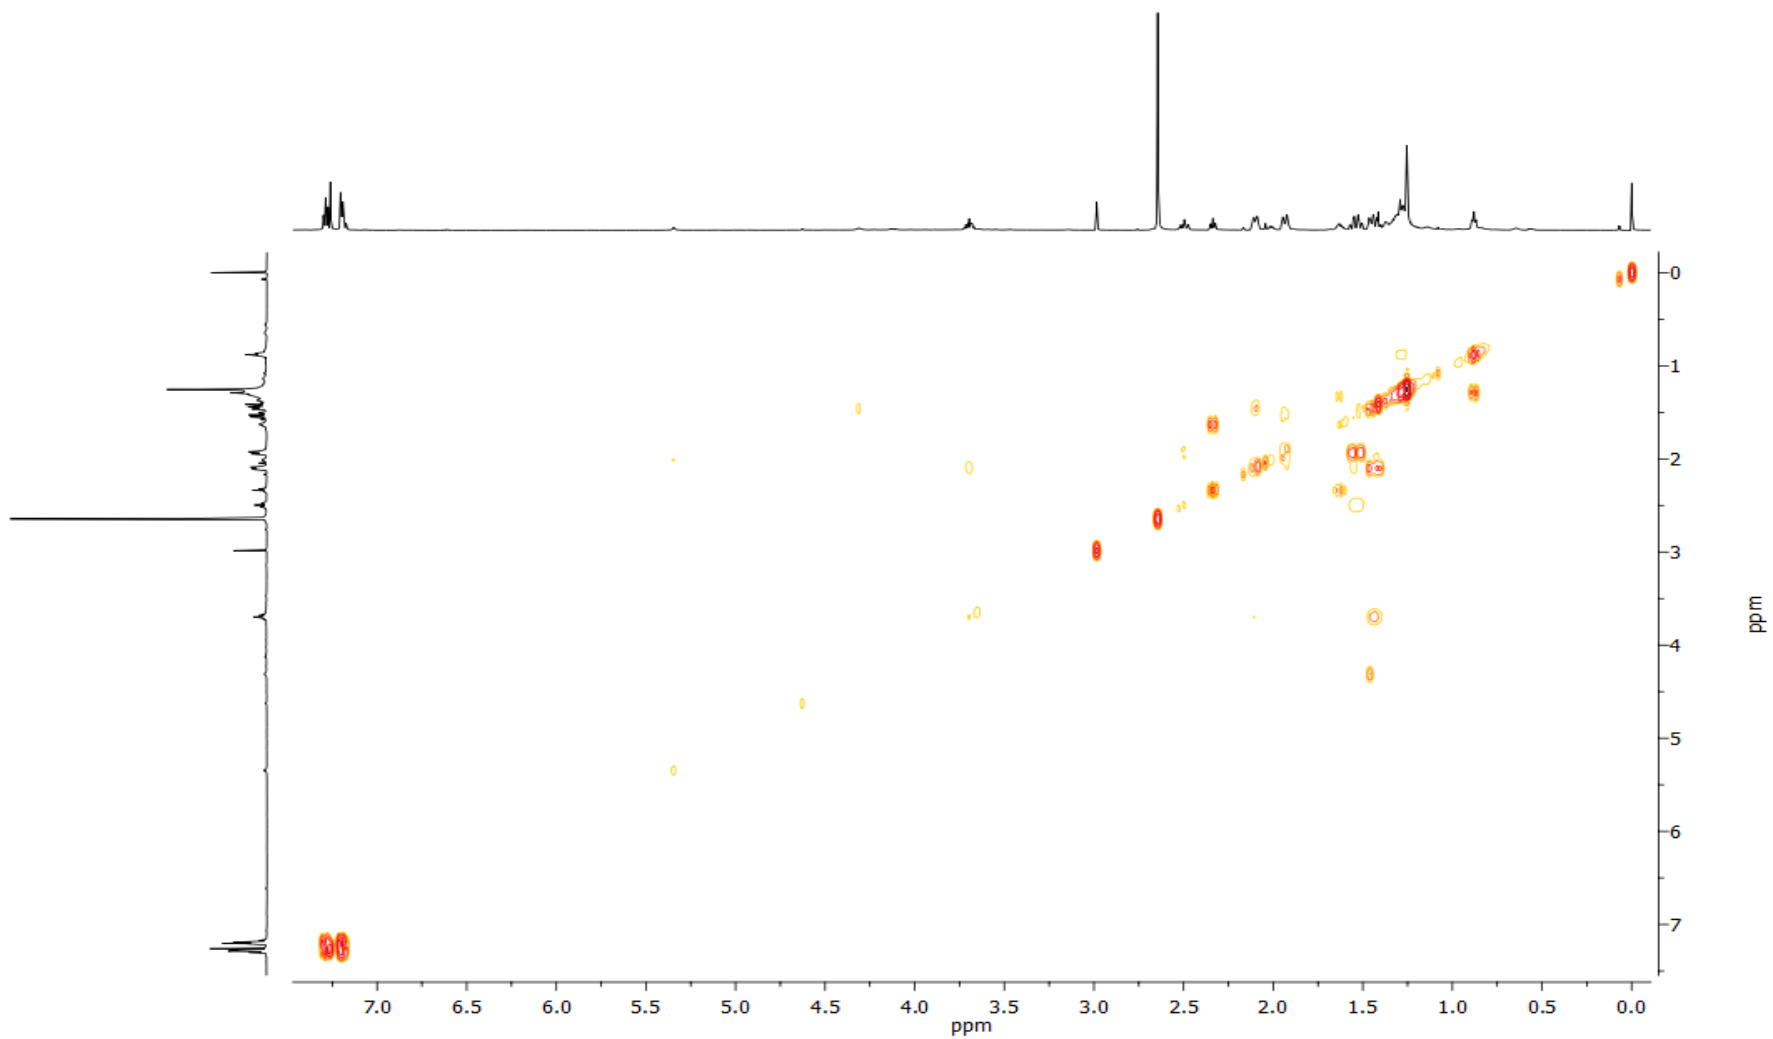

COSY of *trans*-4-phenylcyclohexanol
